# Supplementary material
Source: ML conference proceedings conference paper supplement (https://proceedings.mlr.press/v139/zhang21aa.html)
Supplement: Supplementary file [file zhang21aa-supp.pdf]

---

# Meta Learning for Support Recovery in High-dimensional Precision Matrix Estimation: Supplementary Material

---

## A. Proof of Lemma 1

Define  $\mathcal{S}_{++}^N := \{A \in \mathbb{R}^{N \times N} | A \succ 0\}$ . We first prove the following result:

**Lemma 2.** *For  $\ell(\Omega)$  defined in (4), if  $\Omega \in \mathcal{S}_{++}^N$ , then  $\ell(\Omega)$  is strictly convex.*

*Proof.* The gradient of  $\ell(\Omega)$  is:

$$\nabla \ell(\Omega) = \sum_{k=1}^K T^{(k)} \left( \hat{\Sigma}^{(k)} - \Omega^{-1} \right) \quad (17)$$

The Hessian of  $\ell(\Omega)$  is:

$$\nabla^2 \ell(\Omega) = T\Gamma(\Omega)$$

where  $\Gamma(\Omega) = \Omega^{-1} \otimes \Omega^{-1} \in \mathbb{R}^{N^2 \times N^2}$ .

Since  $\Omega \in \mathcal{S}_{++}^N$ , we have  $\Omega \succ 0$  and thus  $\Omega^{-1} \succ 0$ . According to Theorem 4.2.12 in (Horn et al., 1994), any eigenvalue of  $\Gamma(\Omega) = \Omega^{-1} \otimes \Omega^{-1}$  is the product of two eigenvalues of  $\Omega^{-1}$ , hence positive. Therefore,

$$\Gamma(\Omega) \succ 0$$

$$\nabla^2 \ell(\Omega) \succ 0$$

$\ell(\Omega)$  is strictly convex. □

Now consider  $\ell(\Omega) + \lambda \|\Omega\|_1$ . Since  $\lambda > 0$ , by Lemma 2, we know  $\ell(\Omega) + \lambda \|\Omega\|_1$  is strictly convex for  $\Omega \in \mathcal{S}_{++}^N$ . Therefore, the problem in (5) is strict convex and has a unique solution  $\hat{\Omega}$ .

For  $\hat{\Omega}^{(K+1)}$  in (6), we have

$$\nabla \ell^{(K+1)}(\Omega) = \hat{\Sigma}^{(K+1)} - \Omega^{-1}$$

and

$$\nabla^2 \ell^{(K+1)}(\Omega) = \Gamma(\Omega) = \Omega^{-1} \otimes \Omega^{-1}$$

Thus according to the proof of Lemma 2, we know  $\ell^{(K+1)}(\Omega)$  is strictly convex. Then  $\ell^{(K+1)}(\Omega) + \lambda \|\Omega\|_1$  is strictly convex for  $\lambda > 0$  on  $\mathcal{S}_{++}^N$ . Notice that the constraints  $\text{supp}(\Omega) \subseteq \text{supp}(\hat{\Omega})$  and  $\text{diag}(\Omega) = \text{diag}(\hat{\Omega})$  in (6) can be expressed as  $\Omega_{ij} = 0$  for  $(i, j) \notin S$  and  $\Omega_{ii} = \hat{\Omega}_{ii}$  for  $i \in \{1, \dots, n\}$ . Therefore the constraints are linear. Furthermore, (6) is strictly convex for  $\lambda > 0$  on  $\mathcal{S}_{++}^N$ .

## B. Proof of Theorem 1

Our proof follows the primal-dual witness approach (Ravikumar et al., 2011) which uses Karush-Kuhn Tucker conditions (from optimization) together with concentration inequalities (from statistical learning theory).

### B.1. Preliminaries

Before the formal proof, we first introduce two inequalities with respect to the matrix  $\ell_\infty$ -operator-norm  $\|\cdot\|_\infty$ :

**Lemma 3.** *For a pair of matrices  $A \in \mathbb{R}^{m \times n}$ ,  $B \in \mathbb{R}^{n \times p}$  and a vector  $x \in \mathbb{R}^n$ , we have:*

$$\|Ax\|_\infty \leq \|A\|_\infty \|x\|_\infty \quad (18)$$

$$\|AB\|_\infty \leq \|A\|_\infty \|B\|_\infty \quad (19)$$

*Proof.* Note that

$$\begin{aligned}\|Ax\|_\infty &= \max_{1 \leq i \leq m} |\langle a_i, x \rangle| \\ &\leq \max_{1 \leq i \leq m} \|a_i\|_1 \|x\|_\infty \\ &= \|A\|_\infty \|x\|_\infty\end{aligned}$$

where  $a_i$  is the vector corresponding to the  $i$ -th row of  $A$  and  $\langle \cdot, \cdot \rangle$  is the inner product. Similarly, we have

$$\begin{aligned}\|AB\|_\infty &= \max_{1 \leq i \leq m} \|a_i B\|_1 \\ &= \max_{1 \leq i \leq m} \sum_{k=1}^q \left| \sum_{j=1}^n A_{ij} B_{jk} \right| \\ &\leq \max_{1 \leq i \leq m} \sum_{j=1}^n |A_{ij}| \sum_{k=1}^q |B_{jk}| \\ &\leq \max_{1 \leq i \leq m} \sum_{j=1}^n |A_{ij}| \max_{1 \leq l \leq n} \sum_{k=1}^q |B_{lk}| \\ &= \max_{1 \leq i \leq m} \sum_{j=1}^n |A_{ij}| \|B\|_\infty \\ &= \|A\|_\infty \|B\|_\infty\end{aligned}$$

□

Then we prove Theorem 1 with the five steps in the primal-dual witness approach.

### B.2. Step 1

Let  $(\Omega_S, 0)$  denote the  $N \times N$  matrix such that  $\Omega_{S^c} = 0$ . For any  $\Omega = (\Omega_S, 0) \in \mathcal{S}_{++}^N$ , we need to verify that  $[\nabla^2 \ell((\Omega_S, 0))]_{SS} \succ 0$ .

According to Lemma 2, since  $(\Omega_S, 0) \in \mathcal{S}_{++}^N$ , we have

$$\nabla^2 \ell((\Omega_S, 0)) \succ 0 \quad (20)$$

Denote the vectorization of a matrix  $A$  with  $\text{vec}(A)$  or  $\vec{A}$ . We use  $|S|$  to denote the number of elements in  $S$ . Then we have  $[\nabla^2 \ell((\Omega_S, 0))]_{SS} \in \mathbb{R}^{|S| \times |S|}$ . For  $\forall x \in \mathbb{R}^{|S|}$ ,  $x \neq 0$ , there exists a matrix  $A \in \mathbb{R}^{N \times N}$ ,  $A \neq 0$ , such that  $\vec{A}_S = x$ . Thus we have

$$\begin{aligned}x^T [\nabla^2 \ell((\Omega_S, 0))]_{SS} x &= [\vec{A}_S]^T [\nabla^2 \ell((\Omega_S, 0))]_{SS} \vec{A}_S \\ &= [(\vec{A}_S, 0)]^T \nabla^2 \ell((\Omega_S, 0)) (\vec{A}_S, 0) \\ &> 0\end{aligned}$$

where the inequality follows from (20). Hence  $[\nabla^2 \ell((\Omega_S, 0))]_{SS} \succ 0$ . Thus the step 1 in primal-dual witness is verified.

### B.3. Step 2

Construct the primal variable  $\tilde{\Omega}$  by making  $\tilde{\Omega}_{S^c} = 0$  and solving the restricted problem:

$$\tilde{\Omega}_S = \arg \min_{(\Omega_S, 0) \in \mathcal{S}_{++}^N} \ell((\Omega_S, 0)) + \lambda \|\Omega_S\|_1 \quad (21)$$

### B.4. Step 3

Choose the dual variable  $\tilde{Z}$  in order to fulfill the complementary slackness condition of (5):

$$\begin{cases} \tilde{Z}_{ij} = 1, & \text{if } \tilde{\Omega}_{ij} > 0 \\ \tilde{Z}_{ij} = -1, & \text{if } \tilde{\Omega}_{ij} < 0 \\ \tilde{Z}_{ij} \in [-1, 1], & \text{if } \tilde{\Omega}_{ij} = 0 \end{cases} \quad (22)$$

Therefore we have

$$\|\tilde{Z}\|_\infty \leq 1 \quad (23)$$

### B.5. Step 4

$\tilde{Z}$  is the subgradient of  $\|\tilde{\Omega}\|_1$ . Solve for the dual variable  $\tilde{Z}_{S^c}$  in order that  $(\tilde{\Omega}, \tilde{Z})$  fulfills the stationarity condition of (5):

$$\left[ \nabla \ell \left( (\tilde{\Omega}_S, 0) \right) \right]_S + \lambda \tilde{Z}_S = 0 \quad (24)$$

$$\left[ \nabla \ell \left( (\tilde{\Omega}_S, 0) \right) \right]_{S^c} + \lambda \tilde{Z}_{S^c} = 0 \quad (25)$$

### B.6. Step 5

Now we need to verify that the dual variable solved by Step 4 satisfied the strict dual feasibility condition:

$$\|\tilde{Z}_{S^c}\|_\infty < 1 \quad (26)$$

which, according to the stationarity condition, is equivalent to

$$\frac{1}{\lambda} \left\| \left[ \nabla \ell \left( (\tilde{\Omega}_S, 0) \right) \right]_{S^c} \right\|_\infty < 1 \quad (27)$$

This is the crucial part in the primal-dual witness approach. If we can show the strict dual feasibility condition holds, we can claim that the solution in (21) is equal to the solution in (5), i.e.,  $\hat{\Omega} = \tilde{\Omega}$ . Thus we will have

$$\text{supp}(\hat{\Omega}) = \text{supp}(\tilde{\Omega}) \subseteq S = \text{supp}(\bar{\Omega})$$

### B.7. Proof of the Strict Dual Feasibility Condition

Plug the gradient of loss function (17) in the stationarity condition of (5), we have

$$\sum_{k=1}^K T^{(k)} \left( \hat{\Sigma}^{(k)} - \tilde{\Omega}^{-1} \right) + \lambda \tilde{Z} = 0 \quad (28)$$

Define  $\bar{\Sigma} = \bar{\Omega}^{-1}$ ,  $W^{(k)} := \hat{\Sigma}^{(k)} - \bar{\Sigma}$ ,  $\Psi := \tilde{\Omega} - \bar{\Omega}$ ,  $R(\Psi) := \tilde{\Omega}^{-1} - \bar{\Sigma} + \bar{\Omega}^{-1}\Psi\bar{\Omega}^{-1}$ . Then we can rewrite (28) as

$$\sum_k T^{(k)} W^{(k)} + T \left( \bar{\Omega}^{-1}\Psi\bar{\Omega}^{-1} - R(\Psi) \right) + \lambda \tilde{Z} = 0 \quad (29)$$

From vectorization of product of matrices, we have:

$$\overrightarrow{\bar{\Omega}^{-1}\Psi\bar{\Omega}^{-1}} = \bar{\Gamma} \overrightarrow{\Psi} \quad (30)$$

where  $\bar{\Gamma} := \bar{\Omega}^{-1} \otimes \bar{\Omega}^{-1}$ . Then vectorize both sides of (29) and we can get:

$$T \left( \bar{\Gamma}_{SS} \overrightarrow{\Psi}_S - \overrightarrow{R}_S \right) + \sum_{k=1}^K T^{(k)} \overrightarrow{W}_S^{(k)} + \lambda \overrightarrow{Z}_S = 0 \quad (31)$$

$$T \left( \bar{\Gamma}_{S^c S} \bar{\Psi}_S^\rightarrow - \bar{R}_{S^c}^\rightarrow \right) + \sum_{k=1}^K T^{(k)} \bar{W}_{S^c}^{(k)\rightarrow} + \lambda \bar{Z}_{S^c}^\rightarrow = 0 \quad (32)$$

where we write  $R(\Psi)$  as  $R$  for simplicity. By solving (31) for  $\bar{\Psi}_S^\rightarrow$ , we get:

$$\bar{\Psi}_S^\rightarrow = \frac{1}{T} \bar{\Gamma}_{SS}^{-1} \left( T \bar{R}_S^\rightarrow - \sum_{k=1}^K T^{(k)} \bar{W}_S^{(k)\rightarrow} - \lambda \bar{Z}_S^\rightarrow \right) \quad (33)$$

where we write  $(\bar{\Gamma}_{SS})^{-1}$  as  $\bar{\Gamma}_{SS}^{-1}$  for simplicity. Plug (33) in (32) to solve for  $\bar{Z}_{S^c}^\rightarrow$ :

$$\begin{aligned} \bar{Z}_{S^c}^\rightarrow &= -\frac{1}{\lambda} T \bar{\Gamma}_{S^c S} \bar{\Psi}_S^\rightarrow + \frac{1}{\lambda} T \bar{R}_{S^c}^\rightarrow - \frac{1}{\lambda} \sum_{k=1}^K T^{(k)} \bar{W}_{S^c}^{(k)\rightarrow} \\ &= -\frac{1}{\lambda} \bar{\Gamma}_{S^c S} \bar{\Gamma}_{SS}^{-1} \left( T \bar{R}_S^\rightarrow - \sum_{k=1}^K T^{(k)} \bar{W}_S^{(k)\rightarrow} - \lambda \bar{Z}_S^\rightarrow \right) + \frac{1}{\lambda} T \bar{R}_{S^c}^\rightarrow - \frac{1}{\lambda} \sum_{k=1}^K T^{(k)} \bar{W}_{S^c}^{(k)\rightarrow} \\ &= -\frac{1}{\lambda} \bar{\Gamma}_{S^c S} \bar{\Gamma}_{SS}^{-1} \left( T \bar{R}_S^\rightarrow - \sum_{k=1}^K T^{(k)} \bar{W}_S^{(k)\rightarrow} \right) + \bar{\Gamma}_{S^c S} \bar{\Gamma}_{SS}^{-1} \bar{Z}_S^\rightarrow + \frac{1}{\lambda} \left( T \bar{R}_{S^c}^\rightarrow - \sum_{k=1}^K T^{(k)} \bar{W}_{S^c}^{(k)\rightarrow} \right) \end{aligned}$$

According to (18) and the expression above, we have:

$$\begin{aligned} \|\bar{Z}_{S^c}^\rightarrow\|_\infty &\leq \frac{1}{\lambda} \|\bar{\Gamma}_{S^c S} \bar{\Gamma}_{SS}^{-1}\|_\infty \left\| T \bar{R}_S^\rightarrow - \sum_{k=1}^K T^{(k)} \bar{W}_S^{(k)\rightarrow} \right\|_\infty + \|\bar{\Gamma}_{S^c S} \bar{\Gamma}_{SS}^{-1} \bar{Z}_S^\rightarrow\|_\infty \\ &\quad + \frac{1}{\lambda} \left( T \|\bar{R}_{S^c}^\rightarrow\|_\infty + \left\| \sum_{k=1}^K T^{(k)} \bar{W}_{S^c}^{(k)\rightarrow} \right\|_\infty \right) \\ &\leq \frac{1}{\lambda} \|\bar{\Gamma}_{S^c S} \bar{\Gamma}_{SS}^{-1}\|_\infty \left( T \|\bar{R}_S^\rightarrow\|_\infty + \left\| \sum_{k=1}^K T^{(k)} \bar{W}_S^{(k)\rightarrow} \right\|_\infty \right) \\ &\quad + \|\bar{\Gamma}_{S^c S} \bar{\Gamma}_{SS}^{-1}\|_\infty + \frac{1}{\lambda} \left( T \|\bar{R}_{S^c}^\rightarrow\|_\infty + \left\| \sum_{k=1}^K T^{(k)} \bar{W}_{S^c}^{(k)\rightarrow} \right\|_\infty \right) \end{aligned}$$

where we have used  $\|\bar{Z}_S^\rightarrow\|_\infty \leq 1$  by (23).

Therefore under Assumption 1, we have:

$$\|\tilde{Z}_{S^c}\|_\infty = \|\bar{Z}_{S^c}^\rightarrow\|_\infty \leq \frac{2-\alpha}{\lambda} \left( T \|\bar{R}\|_\infty + \left\| \sum_{k=1}^K T^{(k)} \bar{W}^{(k)\rightarrow} \right\|_\infty \right) + 1 - \alpha$$

If we can bound the two terms:  $T \|\bar{R}\|_\infty, \left\| \sum_{k=1}^K T^{(k)} \bar{W}^{(k)\rightarrow} \right\|_\infty \leq \frac{\alpha\lambda}{8}$ , then we will have:

$$\|\tilde{Z}_{S^c}\|_\infty \leq 1 - \frac{\alpha}{2} < 1$$

From all the reasoning so far, we have the following Lemma:

**Lemma 4.** *If we have  $T \|\bar{R}(\Psi)\|_\infty, \left\| \sum_{k=1}^K T^{(k)} \bar{W}^{(k)\rightarrow} \right\|_\infty \leq \frac{\alpha\lambda}{8}$ , then*

$$\|\tilde{Z}_{S^c}\|_\infty < 1,$$

*i.e., the strict-dual feasibility condition is fulfilled.*

Thus the key step is to bound  $T\|\vec{R}\|_\infty$  and  $\|\sum_{k=1}^K T^{(k)}\overrightarrow{W^{(k)}}\|_\infty$  by  $\frac{\alpha\lambda}{8}$ . We will first consider  $T\|\vec{R}\|_\infty$ .

We have the following Lemma in (Ravikumar et al., 2011) (Lemma 5):

**Lemma 5.** For any  $\rho \in \mathbb{R}^{N \times N}$ , If we have  $\|\rho\|_\infty \leq \frac{1}{3}\kappa_{\bar{\Sigma}}d$ , then the matrix  $J(\rho) := \sum_{k=0}^{\infty} (-1)^k (\bar{\Omega}^{-1}\rho)^k$  will satisfy  $\|J^T\|_\infty \leq \frac{3}{2}$  and the matrix  $R(\rho) := (\bar{\Omega} + \rho)^{-1} - \bar{\Omega}^{-1} + \bar{\Omega}^{-1}\rho\bar{\Omega}^{-1}$  will satisfy:

$$R(\rho) = \bar{\Omega}^{-1}\rho\bar{\Omega}^{-1}J(\rho)\bar{\Omega}^{-1} \quad (34)$$

and

$$\|R(\rho)\|_\infty \leq \frac{3}{2}d\|\rho\|_\infty^2\kappa_{\bar{\Sigma}}^3 \quad (35)$$

Here  $\kappa_{\bar{\Sigma}} := \|\bar{\Sigma}\|_\infty = \|\bar{\Omega}^{-1}\|_\infty$ ,  $d := \max_{1 \leq i \leq N} \#\{j : 1 \leq j \leq N, \bar{\Omega}_{ij} \neq 0\}$ .

For  $R(\rho)$  defined in the above Lemma, we vectorize  $R(\rho)_S$  and then we have

$$\begin{aligned} \overrightarrow{R(\rho)_S} &= \text{vec}([\bar{\Omega} + \rho]_S^{-1} - [\bar{\Omega}^{-1}]_S) + \text{vec}([\bar{\Omega}^{-1}\rho\bar{\Omega}^{-1}]_S) \\ &= \text{vec}([\bar{\Omega} + \rho]_S^{-1} - [\bar{\Omega}^{-1}]_S) + \bar{\Gamma}_{SS}\overrightarrow{\rho_S} \end{aligned} \quad (36)$$

where the first line follows from the definition of  $R(\rho)$  in Lemma 5 and the second line follows from (30)

Define  $\kappa_{\bar{\Gamma}} := \|\bar{\Gamma}_{SS}^{-1}\|_\infty$ . For  $\Omega \in \mathbb{R}^{N \times N}$ , define the subgradient of (21) as  $G(\Omega_S)$ , i.e.,  $G(\Omega_S) := -T[\Omega^{-1}]_S + \sum_{k=1}^K T^{(k)}\hat{\Sigma}_S^{(k)} + \lambda\tilde{Z}_S$ . Since we have proved in Step 1 that  $\ell$  is strictly convex,  $\tilde{\Omega}_S$  is the only solution of the restricted problem of (21). Therefore  $\tilde{\Omega}_S$  is the only solution that satisfies the stationary condition  $G(\tilde{\Omega}_S) = 0$ .

Next for  $\rho \in \mathbb{R}^{N \times N}$ , define  $F(\overrightarrow{\rho_S}) = -\frac{1}{T}\bar{\Gamma}_{SS}^{-1}\overrightarrow{G}(\bar{\Omega}_S + \rho_S) + \overrightarrow{\rho_S}$ . Then:

$$F(\overrightarrow{\rho_S}) = \overrightarrow{\rho_S} \Leftrightarrow G(\bar{\Omega}_S + \rho_S) = 0 \Leftrightarrow \bar{\Omega}_S + \rho_S = \tilde{\Omega}_S$$

Thus the fixed point of  $F(\cdot)$  is  $\Psi_S = \tilde{\Omega}_S - \bar{\Omega}_S$  and it is unique.

Now define  $r := 2\kappa_{\bar{\Gamma}}\left(\frac{\lambda}{T} + \|\sum_{k=1}^K \frac{T^{(k)}}{T}W^{(k)}\|_\infty\right)$ . Suppose  $r \leq \min\left\{\frac{1}{3\kappa_{\bar{\Sigma}}d}, \frac{1}{3\kappa_{\bar{\Sigma}}^3\kappa_{\bar{\Gamma}}d}\right\}$ . Define the  $\ell_\infty$  radius- $r$  ball  $\mathbb{B}(r) := \{\rho_S : \|\rho_S\|_\infty \leq r\}$ . For  $\forall \rho_S \in \mathbb{B}(r)$ , define  $\rho = (\rho_S, 0)$ , i.e.,  $[\rho]_S = \rho_S$  and  $[\rho]_{S^c} = 0$ . We have:

$$G(\bar{\Omega}_S + \rho_S) = T\left(-[\bar{\Omega} + \rho]_S^{-1} + [\bar{\Omega}^{-1}]_S\right) + \sum_{k=1}^K T^{(k)}W_S^{(k)} + \lambda\tilde{Z}_S$$

Then,

$$\begin{aligned} F(\overrightarrow{\rho_S}) &= -\frac{1}{T}\bar{\Gamma}_{SS}^{-1}\text{vec}\left(T\left(-[\bar{\Omega} + \rho]_S^{-1} + [\bar{\Omega}^{-1}]_S\right) + \sum_{k=1}^K T^{(k)}W_S^{(k)} + \lambda\tilde{Z}_S\right) + \overrightarrow{\rho_S} \\ &= \bar{\Gamma}_{SS}^{-1}\left\{\text{vec}\left([\bar{\Omega} + \rho]_S^{-1} - [\bar{\Omega}^{-1}]_S\right) + \bar{\Gamma}_{SS}\overrightarrow{\rho_S}\right\} - \frac{1}{T}\bar{\Gamma}_{SS}^{-1}\text{vec}\left(\sum_{k=1}^K T^{(k)}W_S^{(k)} + \lambda\tilde{Z}_S\right) \\ &= \underbrace{\bar{\Gamma}_{SS}^{-1}\overrightarrow{R(\rho)_S}}_{V_1} - \underbrace{\frac{1}{T}\bar{\Gamma}_{SS}^{-1}\left(\sum_{k=1}^K T^{(k)}\overrightarrow{W_S^{(k)}} + \lambda\overrightarrow{\tilde{Z}_S}\right)}_{V_2} \end{aligned} \quad (37)$$

where the third line follows from (36). For  $V_2$  defined above we have:

$$\begin{aligned} \|V_2\|_\infty &\leq \|\bar{\Gamma}_{SS}^{-1}\|_\infty \left\|\frac{\lambda}{T}\overrightarrow{\tilde{Z}_S} + \sum_{k=1}^K \frac{T^{(k)}}{T}W^{(k)}\right\|_\infty \\ &\leq \kappa_{\bar{\Gamma}}\left(\frac{\lambda}{T} + \left\|\sum_{k=1}^K \frac{T^{(k)}}{T}W^{(k)}\right\|_\infty\right) \\ &= \frac{r}{2} \end{aligned}$$

where the first inequality follows from (18), the second inequality follows from (23) and the third line follows from the definition of  $r$ .

For  $V_1$  defined in (37) we have:

$$\begin{aligned}
 \|V_1\|_\infty &\leq \|\bar{\Gamma}_{SS}^{-1}\|_\infty \|R(\rho)_S\|_\infty \\
 &\leq \kappa_{\bar{\Gamma}} \|R(\rho)\|_\infty \\
 &\leq \kappa_{\bar{\Gamma}} \left( \frac{3}{2} d \kappa_\Sigma^3 \right) \|\rho\|_\infty^2 \\
 &\leq \frac{3}{2} d \kappa_\Sigma^3 \kappa_{\bar{\Gamma}} r^2 \\
 &\leq \frac{r}{2}
 \end{aligned} \tag{38}$$

where the first inequality is due to (18) and the second inequality is due to Lemma 5 and  $\|\rho\|_\infty = \|\rho_S\|_\infty \leq r$ .

Thus  $\|F(\bar{\rho}_S^\lambda)\|_\infty \leq r$ ,  $F(\bar{\rho}_S^\lambda) \in \mathbb{B}(r)$ , which indicates  $F(\mathbb{B}(r)) \subset \mathbb{B}(r)$ . By Brouwer's fixed point theorem (see e.g., (Ortega & Rheinboldt, 2000)), there exists some fixed point of  $F(\cdot)$  in  $\mathbb{B}(r)$ . We have proved that the fixed point of  $F(\cdot)$  is  $\Psi_S$  and it is unique, therefore  $\Psi_S \in \mathbb{B}(r)$ , i.e.,  $\|\Psi\|_\infty = \|\Psi_S\|_\infty \leq r$ . Thus by Lemma 5,  $\|R(\Psi)\|_\infty \leq \frac{3}{2} d \|\Psi\|_\infty^2 \kappa_\Sigma^3$ .

From all the reasoning so far, we have the following Lemma:

**Lemma 6.** *If  $r = 2\kappa_{\bar{\Gamma}} \left( \frac{\lambda}{T} + \left\| \sum_{k=1}^K \frac{T^{(k)}}{T} W^{(k)} \right\|_\infty \right) \leq \min \left\{ \frac{1}{3\kappa_\Sigma d}, \frac{1}{3\kappa_\Sigma^3 \kappa_{\bar{\Gamma}} d} \right\}$ , then*

$$\|\Psi\|_\infty \leq r$$

and

$$\|R(\Psi)\|_\infty \leq \frac{3}{2} d \|\Psi\|_\infty^2 \kappa_\Sigma^3$$

If  $\left\| \sum_{k=1}^K \frac{T^{(k)}}{T} W^{(k)} \right\|_\infty \leq \xi$  with  $\xi > 0$ , then choosing  $\lambda = \frac{8T\xi}{\alpha}$ , we will have

$$\left\| \sum_{k=1}^K T^{(k)} W^{(k)} \right\|_\infty \leq \frac{\alpha\lambda}{8}$$

as well as

$$r = 2\kappa_{\bar{\Gamma}} \left( \frac{\lambda}{T} + \left\| \sum_{k=1}^K \frac{T^{(k)}}{T} W^{(k)} \right\|_\infty \right) \leq 2\kappa_{\bar{\Gamma}} \left( \frac{8}{\alpha} + 1 \right) \xi$$

For  $\xi \leq \delta^* := \frac{\alpha^2}{2\kappa_{\bar{\Gamma}}(\alpha+8)^2} \min \left\{ \frac{1}{3\kappa_\Sigma d}, \frac{1}{3\kappa_\Sigma^3 \kappa_{\bar{\Gamma}} d} \right\}$ , we have  $r \leq \min \left\{ \frac{1}{3\kappa_\Sigma d}, \frac{1}{3\kappa_\Sigma^3 \kappa_{\bar{\Gamma}} d} \right\}$ . Thus according to Lemma 6, we have

$$\|\Psi\|_\infty = \|\Psi_S\|_\infty \leq r \leq 2\kappa_{\bar{\Gamma}} \left( \frac{8}{\alpha} + 1 \right) \xi$$

Therefore,

$$\begin{aligned}
 \|R(\Psi)\|_\infty &\leq \frac{3}{2} d \|\Psi\|_\infty^2 \kappa_\Sigma^3 \\
 &\leq 6d \kappa_\Sigma^3 \kappa_{\bar{\Gamma}}^2 \left( \frac{8}{\alpha} + 1 \right)^2 \delta^2 \\
 &= \left( 6d \kappa_\Sigma^3 \kappa_{\bar{\Gamma}}^2 \left( \frac{8}{\alpha} + 1 \right)^2 \xi \right) \frac{\alpha\lambda}{8T} \\
 &\leq \frac{\alpha\lambda}{8T}
 \end{aligned}$$

Then by Lemma 4,  $\|\tilde{Z}_{Sc}\|_\infty < 1$  and the strict dual feasibility condition is fulfilled. According to the primal-dual witness approach,  $\text{supp}(\hat{\Omega}) = \text{supp}(\tilde{\Omega}) \subseteq \text{supp}(\bar{\Omega})$ .

From all the reasoning so far, we can state the following lemma.

**Lemma 7.** *If  $\|\sum_{k=1}^K \frac{T^{(k)}}{T} W^{(k)}\|_\infty \leq \xi$  with  $\xi \in (0, \delta^*]$ , then choosing  $\lambda = \frac{8T\xi}{\alpha}$ , we have  $\hat{\Omega} = \tilde{\Omega}$ ,  $\text{supp}(\hat{\Omega}) \subseteq \text{supp}(\tilde{\Omega})$  and*

$$\|\hat{\Omega} - \tilde{\Omega}\|_\infty = \|\Psi\|_\infty \leq 2\kappa_{\bar{\Gamma}} \left( \frac{8}{\alpha} + 1 \right) \xi$$

For the next step, we need to prove the tail condition of  $\sum_{k=1}^K \frac{T^{(k)}}{T} W^{(k)}$ , that is, for  $\xi > 0$ ,  $\|\sum_{k=1}^K \frac{T^{(k)}}{T} W^{(k)}\|_\infty \leq \xi$  with high probability.

### B.8. Proof of the Tail Condition

Note that for  $k = 1, \dots, K$ ,

$$W^{(k)} = \hat{\Sigma}^{(k)} - \bar{\Sigma} = \hat{\Sigma}^{(k)} - \bar{\Sigma}^{(k)} + \bar{\Sigma}^{(k)} - \bar{\Sigma} = \hat{\Sigma}^{(k)} - \bar{\Sigma}^{(k)} + \left( \bar{\Omega} + \Delta^{(k)} \right)^{-1} - \bar{\Sigma} \quad (39)$$

Here  $\{\Delta^{(k)}\}_{k=1}^K$  are i.i.d. random matrices following the distribution  $P$  specified in Definition 3. To achieve the tail condition of  $\sum_{k=1}^K \frac{T^{(k)}}{T} W^{(k)}$ , we can bound the random terms with respect to  $\{\Delta^{(k)}\}_{k=1}^K$  and the random terms with respect to the empirical sample covariance matrices  $\{\hat{\Sigma}^{(k)}\}_{k=1}^K$  separately.

We have assumed that the sample size is the same for all tasks, i.e., there are  $n$  samples for each of the  $K$  tasks and  $T^{(k)}/T = 1/K$ . For the sample covariance matrices, we have the following lemma:

**Lemma 8.** *For  $\{X_t^{(k)}\}_{1 \leq t \leq n, 1 \leq k \leq K}$  following a family of random  $N$ -dimensional multivariate sub-Gaussian distributions of size  $K$  with parameter  $\sigma$  described in Definition 3, we have*

$$\mathbb{P} \left[ \left| \sum_{k=1}^K \frac{1}{K} \left( \hat{\Sigma}_{ij}^{(k)} - \bar{\Sigma}_{ij}^{(k)} \right) \right| > \nu \right] \leq \exp \left\{ -\frac{nK\nu^2}{128(1+4\sigma^2)^2 \gamma^2} \right\} \quad (40)$$

and

$$\mathbb{P} \left[ \left\| \sum_{k=1}^K \frac{1}{K} \left( \hat{\Sigma}^{(k)} - \bar{\Sigma}^{(k)} \right) \right\|_\infty > \nu \right] \leq 2N(N+1) \exp \left\{ -\frac{nK\nu^2}{128(1+4\sigma^2)^2 \gamma^2} \right\} \quad (41)$$

for  $\hat{\Sigma}^{(k)} = \frac{1}{n} \sum_{t=1}^n X_t^{(k)} (X_t^{(k)})^T$ ,  $1 \leq i, j \leq N$ , and  $0 \leq \nu \leq 8(1+4\sigma^2)\gamma$ .

The proof of this lemma is in Section G.

For  $\{\Delta^{(k)}\}_{k=1}^K$ , we have the following lemma

**Lemma 9.** *For  $\{\Delta^{(k)}\}_{k=1}^K$  in a family of random  $N$ -dimensional multivariate sub-Gaussian distributions of size  $K$  with parameter  $\sigma$  described in Definition 3, define*

$$H(\Delta^{(1)}, \dots, \Delta^{(K)}) := \frac{1}{K} \sum_{k=1}^K \bar{\Sigma}^{(k)} = \frac{1}{K} \sum_{k=1}^K \left( \bar{\Omega} + \Delta^{(k)} \right)^{-1} \quad (42)$$

Then we have

$$\mathbb{P} [\|H - \mathbb{E}[H]\|_2 > t] \leq 2N \exp \left\{ -\frac{\lambda_{\min}^4 K t^2}{128c_{\max}^2} \right\} \quad (43)$$

for  $t \geq 0$  and  $\lambda_{\min} = \lambda_{\min}(\bar{\Omega})$ .

The proof of this lemma is in Section H.

Our goal is to find a probability upper bound for  $\|\sum_{k=1}^K \frac{T^{(k)}}{T} W^{(k)}\|_\infty > \xi$  with  $0 < \xi \leq \delta^*$ . According to (39) and the

condition  $\beta \leq \delta^*/2$ , we have

$$\begin{aligned}
 \left\| \sum_{k=1}^K \frac{T^{(k)}}{T} W^{(k)} \right\|_\infty &= \left\| \sum_{k=1}^K \frac{1}{K} W^{(k)} \right\|_\infty \\
 &\leq \left\| \sum_{k=1}^K \frac{1}{K} \left( \hat{\Sigma}^{(k)} - \bar{\Sigma}^{(k)} \right) \right\|_\infty + \left\| \frac{1}{K} \sum_{k=1}^K \bar{\Sigma}^{(k)} - \bar{\Sigma} \right\|_\infty \\
 &= \left\| \sum_{k=1}^K \frac{1}{K} \left( \hat{\Sigma}^{(k)} - \bar{\Sigma}^{(k)} \right) \right\|_\infty + \|H - \mathbb{E}[H] + \mathbb{E}[H] - \bar{\Sigma}\|_\infty \\
 &= \left\| \sum_{k=1}^K \frac{1}{K} \left( \hat{\Sigma}^{(k)} - \bar{\Sigma}^{(k)} \right) \right\|_\infty + \|H - \mathbb{E}[H]\|_2 + \|\mathbb{E}[H] - \bar{\Sigma}\|_\infty \\
 &\leq \left\| \sum_{k=1}^K \frac{1}{K} \left( \hat{\Sigma}^{(k)} - \bar{\Sigma}^{(k)} \right) \right\|_\infty + \|H - \mathbb{E}[H]\|_2 + \beta
 \end{aligned} \tag{44}$$

where we have used the property that  $\|A\|_2 \geq \|A\|_\infty$  for any matrix  $A$  (see e.g., (Horn & Johnson, 2012)).

Now for  $\delta \in (0, \delta^*/2]$ , consider

$$\xi = \delta + \delta^*/2 \tag{45}$$

then  $0 < \xi \leq \delta^*$ ,  $\delta + \tau \leq \xi$  and  $\lambda = \frac{8T\xi}{\alpha} = \frac{8\delta + 4\delta^*}{\alpha}$ .

According to the condition  $\beta \leq \delta^*/2$ , we know that  $\delta^*/2 - \beta \geq 0$ . Set  $t = \delta^*/2 - \beta$  in (43). Then,

$$\mathbb{P} [\|H - \mathbb{E}[H]\|_2 > \delta^*/2 - \beta] \leq 2N \exp \left( -\frac{\lambda_{\min}^4 K}{128c_{\max}^2} \left( \frac{\delta^*}{2} - \beta \right)^2 \right) \tag{46}$$

By (44) and (45), we have

$$\left\{ \left\| \sum_{k=1}^K \frac{1}{K} \left( \hat{\Sigma}^{(k)} - \bar{\Sigma}^{(k)} \right) \right\|_\infty \leq \delta \text{ and } \|H - \mathbb{E}[H]\|_2 \leq \frac{\delta^*}{2} - \beta \right\} \Rightarrow \left\{ \left\| \sum_{k=1}^K \frac{T^{(k)}}{T} W^{(k)} \right\|_\infty \leq \xi \right\}$$

and thus

$$\begin{aligned}
 \mathbb{P} \left[ \left\| \sum_{k=1}^K \frac{T^{(k)}}{T} W^{(k)} \right\|_\infty \leq \xi \right] &\geq \mathbb{P} \left[ \left\| \sum_{k=1}^K \frac{1}{K} \left( \hat{\Sigma}^{(k)} - \bar{\Sigma}^{(k)} \right) \right\|_\infty \leq \delta \text{ and } \|H - \mathbb{E}[H]\|_2 \leq \frac{\delta^*}{2} - \beta \right] \\
 &= 1 - \mathbb{P} \left[ \left\| \sum_{k=1}^K \frac{1}{K} \left( \hat{\Sigma}^{(k)} - \bar{\Sigma}^{(k)} \right) \right\|_\infty > \delta \text{ or } \|H - \mathbb{E}[H]\|_2 > \frac{\delta^*}{2} - \beta \right] \\
 &\geq 1 - \left( \mathbb{P} \left[ \left\| \sum_{k=1}^K \frac{1}{K} \left( \hat{\Sigma}^{(k)} - \bar{\Sigma}^{(k)} \right) \right\|_\infty > \delta \right] + \mathbb{P} \left[ \|H - \mathbb{E}[H]\|_2 > \frac{\delta^*}{2} - \beta \right] \right) \\
 &= 1 - \mathbb{P} \left[ \left\| \sum_{k=1}^K \frac{1}{K} \left( \hat{\Sigma}^{(k)} - \bar{\Sigma}^{(k)} \right) \right\|_\infty > \delta \right] - 2N \exp \left( -\frac{\lambda_{\min}^4 K}{128c_{\max}^2} \left( \frac{\delta^*}{2} - \beta \right)^2 \right)
 \end{aligned} \tag{47}$$

where we have applied (46) for the last step.

When  $0 < \delta < 8(1 + 4\sigma^2)\gamma$ , we can let  $\nu = \delta$  in (41) to get

$$\mathbb{P} \left[ \left\| \sum_{k=1}^K \frac{1}{K} \left( \hat{\Sigma}^{(k)} - \bar{\Sigma}^{(k)} \right) \right\|_\infty > \delta \right] \leq 1 - 2N(N+1) \exp \left\{ -\frac{nK\delta^2}{128(1+4\sigma^2)^2\gamma^2} \right\} \tag{48}$$



When  $\delta \geq 8(1+4\sigma^2)\gamma$ , we set  $\nu = 8(1+4\sigma^2)\gamma$  in (41) to get

$$\begin{aligned} \mathbb{P} \left[ \left\| \sum_{k=1}^K \frac{1}{K} (\hat{\Sigma}^{(k)} - \bar{\Sigma}^{(k)}) \right\|_{\infty} > \delta \right] &\leq \mathbb{P} \left[ \left\| \sum_{k=1}^K \frac{1}{K} (\hat{\Sigma}^{(k)} - \bar{\Sigma}^{(k)}) \right\|_{\infty} > 8(1+4\sigma^2)\gamma \right] \\ &\leq 2N(N+1) \exp \left\{ -\frac{nK(8(1+4\sigma^2)\gamma)^2}{128(1+4\sigma^2)^2\gamma^2} \right\} \\ &= 2N(N+1) \exp \left\{ -\frac{nK}{2} \right\} \end{aligned} \quad (49)$$

Consider the maximum value of the two upper bounds in (48) and (49). We can get

$$\begin{aligned} \mathbb{P} \left[ \left\| \sum_{k=1}^K \frac{1}{K} (\hat{\Sigma}^{(k)} - \bar{\Sigma}^{(k)}) \right\|_{\infty} > \delta \right] &\leq \max \left\{ 2N(N+1) \exp \left\{ -\frac{nK\delta^2}{128(1+4\sigma^2)^2\gamma^2} \right\}, 2N(N+1) \exp \left\{ -\frac{nK}{2} \right\} \right\} \\ &= 2N(N+1) \exp \left( -\frac{nK}{2} \min \left\{ \frac{\delta^2}{64(1+4\sigma^2)^2\gamma^2}, 1 \right\} \right) \end{aligned} \quad (50)$$

According to (47) and (50), we have

$$\begin{aligned} \mathbb{P} \left[ \left\| \sum_{k=1}^K \frac{T^{(k)}}{T} W^{(k)} \right\|_{\infty} \leq \xi \right] &\geq 1 - \mathbb{P} \left[ \left\| \sum_{k=1}^K \frac{1}{K} (\hat{\Sigma}^{(k)} - \bar{\Sigma}^{(k)}) \right\|_{\infty} > \delta \right] - 2N \exp \left( -\frac{\lambda_{\min}^4 K}{128c_{\max}^2} \left( \frac{\delta^*}{2} - \beta \right)^2 \right) \\ &\geq 1 - 2N(N+1) \exp \left( -\frac{nK}{2} \min \left\{ \frac{\delta^2}{64(1+4\sigma^2)^2\gamma^2}, 1 \right\} \right) \\ &\quad - 2N \exp \left( -\frac{\lambda_{\min}^4 K}{128c_{\max}^2} \left( \frac{\delta^*}{2} - \beta \right)^2 \right) \end{aligned} \quad (51)$$

Namely, with probability at least

$$1 - 2N(N+1) \exp \left( -\frac{nK}{2} \min \left\{ \frac{\delta^2}{64(1+4\sigma^2)^2\gamma^2}, 1 \right\} \right) - 2N \exp \left( -\frac{\lambda_{\min}^4 K}{128c_{\max}^2} \left( \frac{\delta^*}{2} - \beta \right)^2 \right)$$

we have  $\left\| \sum_{k=1}^K \frac{T^{(k)}}{T} W^{(k)} \right\|_{\infty} \leq \xi \leq \delta^*$ ,  $\text{supp}(\hat{\Omega}) \subseteq \text{supp}(\bar{\Omega})$  and according to Lemma 7, we have

$$\|\hat{\Omega} - \bar{\Omega}\|_{\infty} = \|\Delta\|_{\infty} \leq 2\kappa_{\Gamma} \left( \frac{8}{\alpha} + 1 \right) \xi = \kappa_{\Gamma} \left( \frac{8}{\alpha} + 1 \right) (2\delta + \delta^*)$$

which completes our proof of Theorem 1.

### C. Proof of Theorem 2

We have the following lemma as a sufficient condition for the sign-consistency of (5).

**Lemma 10.** For  $\xi \in (0, \delta^*)$ , if

$$\left\| \sum_{k=1}^K \frac{T^{(k)}}{T} W^{(k)} \right\|_{\infty} \leq \xi \quad (52)$$

and

$$\frac{\omega_{\min}}{2} \geq 2\kappa_{\Gamma} \left( \frac{8}{\alpha} + 1 \right) \xi \quad (53)$$

where  $\omega_{\min} := \min_{(i,j) \in S} |\bar{\Omega}_{ij}|$ , then the estimate  $\hat{\Omega}$  of (5) is sign-consistent.

The proof is in Section I.

In the remaining part of the proof, we assume that the condition  $\beta \leq \delta^\dagger/2$  stated in Theorem 2 is satisfied. We will consider two cases for different  $\omega_{\min} > 0$ .

Case (i). If

$$\omega_{\min} \geq \frac{2\alpha}{8 + \alpha} \min \left\{ \frac{1}{3\kappa_{\Sigma}d}, \frac{1}{3\kappa_{\Sigma}^3\kappa_{\Gamma}d} \right\} \quad (54)$$

then

$$0 < \delta^\dagger = \delta^*$$

and

$$\frac{\omega_{\min}}{2} \geq 2\kappa_{\Gamma} \left( \frac{8}{\alpha} + 1 \right) \delta^*$$

Thus for  $\xi = \delta^*$ , (53) holds. Then according to (51), with probability at least

$$\begin{aligned} & 1 - 2N(N+1) \exp \left( -\frac{nK}{2} \min \left\{ \frac{(\delta^*/2)^2}{64(1+4\sigma^2)^2\gamma^2}, 1 \right\} \right) - 2N \exp \left( -\frac{\lambda_{\min}^4 K}{128c_{\max}^2} \left( \frac{\delta^*}{2} - \beta \right)^2 \right) \\ &= 1 - 2N(N+1) \exp \left( -\frac{nK}{2} \min \left\{ \frac{(\delta^\dagger)^2}{256(1+4\sigma^2)^2\gamma^2}, 1 \right\} \right) - 2N \exp \left( -\frac{\lambda_{\min}^4 K}{128c_{\max}^2} \left( \frac{\delta^*}{2} - \beta \right)^2 \right) \end{aligned}$$

we have  $\| \sum_{k=1}^K \frac{T^{(k)}}{T} W^{(k)} \|_{\infty} \leq \delta^*$  and thus by Lemma 10, we have that (5) is sign-consistent.

Case (ii). If

$$\omega_{\min} < \frac{2\alpha}{8 + \alpha} \min \left\{ \frac{1}{3\kappa_{\Sigma}d}, \frac{1}{3\kappa_{\Sigma}^3\kappa_{\Gamma}d} \right\},$$

then

$$\frac{\omega_{\min}}{2} < 2\kappa_{\Gamma} \left( \frac{8}{\alpha} + 1 \right) \delta^*$$

and

$$0 < \delta^\dagger = \delta' \leq \delta^*$$

Thus

$$\frac{\omega_{\min}}{2} \geq 2\kappa_{\Gamma} \left( \frac{8}{\alpha} + 1 \right) \delta' \quad (55)$$

Now apply (51) with  $\xi = \delta' = \delta^\dagger$ , we have

$$\begin{aligned} \mathbb{P} \left[ \left\| \sum_{k=1}^K \frac{T^{(k)}}{T} W^{(k)} \right\|_{\infty} \leq \delta' \right] &\geq 1 - 2N(N+1) \exp \left( -\frac{nK}{2} \min \left\{ \frac{(\delta' - \delta^*/2)^2}{64(1+4\sigma^2)^2\gamma^2}, 1 \right\} \right) \\ &\quad - 2N \exp \left( -\frac{\lambda_{\min}^4 K}{128c_{\max}^2} \left( \frac{\delta^*}{2} - \beta \right)^2 \right) \\ &\geq 1 - 2N(N+1) \exp \left( -\frac{nK}{2} \min \left\{ \frac{(\delta^\dagger - \delta^\dagger/2)^2}{64(1+4\sigma^2)^2\gamma^2}, 1 \right\} \right) \\ &\quad - 2N \exp \left( -\frac{\lambda_{\min}^4 K}{128c_{\max}^2} \left( \frac{\delta^*}{2} - \beta \right)^2 \right) \\ &= 1 - 2N(N+1) \exp \left( -\frac{nK}{2} \min \left\{ \frac{(\delta^\dagger)^2}{256(1+4\sigma^2)^2\gamma^2}, 1 \right\} \right) \\ &\quad - 2N \exp \left( -\frac{\lambda_{\min}^4 K}{128c_{\max}^2} \left( \frac{\delta^*}{2} - \beta \right)^2 \right) \end{aligned}$$

Therefore with probability at least

$$1 - 2N(N+1) \exp\left(-\frac{nK}{2} \min\left\{\frac{(\delta^\dagger)^2}{256(1+4\sigma^2)^2\gamma^2}, 1\right\}\right) - 2N \exp\left(-\frac{\lambda_{\min}^4 K}{128c_{\max}^2} \left(\frac{\delta^*}{2} - \beta\right)^2\right)$$

we have  $\|\sum_{k=1}^K \frac{T^{(k)}}{T} W^{(k)}\|_\infty \leq \delta'$  and thus by Lemma 10, sign-consistency is guaranteed.

In conclusion, when  $\tau \leq \delta^\dagger/2$ , with probability at least

$$1 - 2N(N+1) \exp\left(-\frac{nK}{2} \min\left\{\frac{(\delta^\dagger)^2}{256(1+4\sigma^2)^2\gamma^2}, 1\right\}\right) - 2N \exp\left(-\frac{\lambda_{\min}^4 K}{128c_{\max}^2} \left(\frac{\delta^*}{2} - \beta\right)^2\right)$$

the estimator  $\hat{\Omega}$  is sign-consistent and thus  $\text{supp}(\hat{\Omega}) = \text{supp}(\bar{\Omega})$ , which completes our proof of Theorem 2.

### D. Proof of Theorem 3

For  $\forall Q \in [-1/(2d), 1/(2d)]^{N \times N}$ , let  $\Omega(E) := I + Q \odot \text{mat}(E)$  for  $E \in \mathcal{E}$  where  $\mathcal{E}$  is the set of all possible values of  $E$  generated according to Theorem 3 and  $\text{mat}(E) \in \{0, 1\}^{N \times N}$  is defined as follows:  $\text{mat}(E)_{ij} = 1$  if  $(i, j) \in E$  and  $\text{mat}(E)_{ij} = 0$  if  $(i, j) \notin E$  for  $\forall E \in \mathcal{E}$ . Then we know  $\Omega(E)$  is real and symmetric. Thus its eigenvalues are real. By Gershgorin circle theorem (Golub & Van Loan, 2012), for any eigenvalue  $\lambda$  of  $\Omega(E)$ ,  $\lambda$  lies in one of the Gershgorin circles, i.e.,  $|\lambda - \Omega(E)_{jj}| \leq \sum_{l \neq j} |\Omega(E)_{jl}|$  holds for some  $j$ . Since  $\text{mat}(E)_{jj} = 0$  and  $|Q_{jl}| \leq \frac{1}{2d}$  for  $1 \leq l \leq N$ , we have  $\Omega(E)_{jj} = 1$  and  $\sum_{l \neq j} |\Omega(E)_{jl}| \leq d \cdot \frac{1}{2d} = \frac{1}{2}$ . Thus  $\lambda \in [\frac{1}{2}, \frac{3}{2}]$  and  $\Omega(E)$  is positive definite. Thus, we have constructed a multiple Gaussian graphical model. Now consider  $\Omega(E)^{-1}$ . Because any eigenvalue  $\mu$  of  $[\Omega(E)]^{-1}$  is the reciprocal of an eigenvalue of  $\Omega(E)$ , we have  $|\mu| \in [\frac{2}{3}, 2]$ .

Use  $\lambda_1(A)$  to denote the largest eigenvalue of matrix  $A$ . for  $E, E' \in \mathcal{E}$ , according to Theorem H.1.d. in (Marshall et al., 2010), we have

$$\lambda_1(\Omega(E')\Omega(E)^{-1}) \leq \lambda_1(\Omega(E'))\lambda_1(\Omega(E)^{-1}) \leq \frac{3}{2} \cdot 2 = 3$$

which gives us

$$\text{tr}(\Omega(E')\Omega(E)^{-1}) \leq N\lambda_1(\Omega(E')\Omega(E)^{-1}) \leq 3N \quad (56)$$

For  $\mathbf{Q} = \{Q^{(k)}\}_{k=1}^K$ , we know that there is a bijection between  $\mathcal{E}$  and the set of all circular permutations of nodes  $V = \{1, \dots, N\}$ . Thus  $|\mathcal{E}|$ , i.e., the size of  $\mathcal{E}$ , is the total number of circular permutations of  $N$  elements, which is  $C_E := (N-1)!/2$ . Since  $E$  is uniformly distributed on  $\mathcal{E}$ , the entropy of  $E$  given  $\mathbf{Q}$  is  $H(E|\mathbf{Q}) = \log C_E$ .

Consider a family of  $N$ -dimensional random multivariate Gaussian distributions of size  $K$  with covariance matrices  $\{\bar{\Sigma}^{(k)}\}_{k=1}^K$  generated according to Theorem 3. We use  $\mathbf{X} := \{X_t^{(k)}\}_{1 \leq t \leq n, 1 \leq k \leq K}$  to denote the collection of  $n$  samples from each of the  $K$  distributions. Then for the mutual information  $\mathbb{I}(\mathbf{X}; E|\mathbf{Q})$ . We have the following bound:

$$\begin{aligned} \mathbb{I}(\mathbf{X}; E|\mathbf{Q}) &\leq \frac{1}{C_E^2} \sum_E \sum_{E'} \mathbb{KL}(P_{\mathbf{X}|E, \mathbf{Q}} \| P_{\mathbf{X}|E', \mathbf{Q}}) \\ &= \frac{1}{C_E^2} \sum_E \sum_{E'} \sum_{k=1}^K \sum_{t=1}^n \mathbb{KL}(P_{X_t^{(k)}|E, Q^{(k)}} \| P_{X_t^{(k)}|E', Q^{(k)}}) \\ &= \frac{n}{C_E^2} \sum_E \sum_{E'} \sum_{k=1}^K \frac{1}{2} \left[ \text{tr} \left( (I + Q^{(k)} \odot \text{mat}(E')) (I + Q^{(k)} \odot \text{mat}(E))^{-1} \right) \right. \\ &\quad \left. - N + \log \frac{\det(I + Q^{(k)} \odot \text{mat}(E))}{\det(I + Q^{(k)} \odot \text{mat}(E'))} \right] \end{aligned} \quad (57)$$

Since the summation is taken over all  $(E, E')$  pairs, the log term cancels with each other. For the trace term, by (56), we have

$$\text{tr} \left( (I + Q^{(k)} \odot \text{mat}(E')) (I + Q^{(k)} \odot \text{mat}(E))^{-1} \right) \leq 3N \quad (58)$$

for  $1 \leq k \leq K$  and  $E, E' \in \mathcal{E}$ . Putting (58) back to (57) gives

$$\mathbb{I}(\mathbf{X}; E|\mathbf{Q}) \leq \frac{n}{C_E^2} \sum_E \sum_{E'} \sum_{k=1}^K \frac{1}{2} (3N - N) = nNK \quad (59)$$

For any estimate  $\hat{S}$  of  $S$ , define  $\hat{E} = \{(i, j) : (i, j) \in \hat{S}, i \neq j\}$ . Since  $E \subseteq S$ , we have  $\mathbb{P}\{S \neq \hat{S}\} \geq \mathbb{P}\{E \neq \hat{E}\}$ . Then by applying Theorem 1 in (Ghoshal & Honorio, 2017), we get

$$\begin{aligned} \mathbb{P}\{S \neq \hat{S}\} &\geq \mathbb{P}\{E \neq \hat{E}\} \\ &\geq 1 - \frac{\mathbb{I}(\mathbf{X}; S|\mathbf{Q}) + \log 2}{H(S|\mathbf{Q})} \\ &\geq 1 - \frac{nNK + \log 2}{\log[(N-1)!/2]} \end{aligned}$$

For  $\log((N-1)!)$ , we have:

$$\begin{aligned} \log((N-1)!) &= \sum_{i=1}^{N-1} \log i \\ &\geq \int_1^{N-1} \log x dx \\ &= (N-1) \log(N-1) - N + 2 \\ &= (N-1) \log N + (N-1) \log \frac{N-1}{N} + 2 - N \end{aligned}$$

Since

$$(N-1) \log \frac{N-1}{N} + 2 = 2 - (N-1) \log \left(1 + \frac{1}{N-1}\right) \geq 2 - 1 > 0$$

we have

$$\begin{aligned} \log((N-1)!) &\geq (N-1) \log N - N = N \log N - N - \log N \\ \log((N-1)!/2) &= \log((N-1)!) - \log 2 \geq N \log N - N - \log 2N \end{aligned}$$

For  $N \geq 5$ ,  $N \log N - N - \log 2N > 0$ , thus we have

$$\mathbb{P}\{S \neq \hat{S}\} \geq 1 - \frac{nNK + \log 2}{\log[(N-1)!/2]} \geq 1 - \frac{nNK + \log 2}{N \log N - N - \log 2N}$$

which completes our proof of Theorem 3.

## E. Proof of Theorem 4

By assumption, we have successfully recovered the true support union in the first step, i.e.,  $\text{supp}(\hat{\Omega}) = S$ . Since there are constraints that  $\text{supp}(\Omega) \subseteq \text{supp}(\hat{\Omega}) = S$  and  $\text{diag}(\Omega) = \text{diag}(\hat{\Omega})$  in (6), we have

$$\begin{aligned} \ell^{(K+1)}(\Omega) &= \langle \hat{\Sigma}^{(K+1)}, \Omega \rangle - \log \det(\Omega) \\ &= \langle \hat{\Sigma}^{(K+1), S}, \Omega \rangle - \log \det(\Omega) \end{aligned} \quad (60)$$

where  $\hat{\Sigma}^{(K+1), S} := \left( \hat{\Sigma}_S^{(K+1)}, 0 \right)$ . Then the Lagrangian of the problem (6) is

$$\ell^{(K+1)}(\Omega) + \lambda \|\Omega\|_1 + \langle \mu, \Omega \rangle + \langle \nu, \text{diag}(\Omega - \hat{\Omega}) \rangle \quad (61)$$

where  $\mu \in \mathbb{R}^{N \times N}$ ,  $\nu \in \mathbb{R}^N$  are the Lagrange multipliers satisfying  $\mu_S = 0$ . Here we set  $\mu = \bar{\Sigma}^{(K+1), S^c} = (\bar{\Sigma}_{S^c}^{(K+1)}, 0)$  and  $\nu = \text{diag}(\bar{\Sigma}^{(K+1)} - \hat{\Sigma}^{(K+1)})$  in (61). Define  $W^{(K+1)} := \bar{\Sigma}^{(K+1), S_{\text{off}}} - \hat{\Sigma}^{(K+1), S_{\text{off}}}$ . With the primal-dual witness approach, we can get the following lemma similar to Lemma 7.

**Lemma 11.** Under Assumption 2, if  $\|W^{(K+1)}\|_\infty \leq \xi$  with  $\xi \in (0, \delta^{(K+1),*}]$ , then choosing  $\lambda = \frac{8\xi}{\alpha^{(K+1)}}$ , we have  $\text{supp}(\hat{\Omega}^{(K+1)}) \subseteq \text{supp}(\bar{\Omega}^{(K+1)})$  and

$$\|\hat{\Omega}^{(K+1)} - \bar{\Omega}^{(K+1)}\|_\infty \leq 2\kappa_{\bar{\Gamma}^{(K+1)}} \left( \frac{8}{\alpha^{(K+1)}} + 1 \right) \xi \quad (62)$$

The proof is in Section J.

By the definition of  $W^{(K+1)}$ , we know that  $W_{S_{\text{off}}}^{(K+1)} = 0$  and  $W_{S_{\text{off}}}^{(K+1)} = [\hat{\Sigma}^{(K+1)} - \bar{\Sigma}^{(K+1)}]_{S_{\text{off}}}$ . Thus  $\|W^{(K+1)}\|_\infty = \|\hat{\Sigma}^{(K+1)} - \bar{\Sigma}^{(K+1)}\|_{S_{\text{off}}}$ . Since we have assumed  $\|\bar{\Sigma}^{(K+1)}\|_\infty \leq \gamma^{(K+1)}$ , according to Lemma 8 and the proof of (50), we have

$$\begin{aligned} \mathbb{P} \left[ \|W^{(K+1)}\|_\infty \leq \delta^{(K+1),\dagger} \right] &= \mathbb{P} \left[ \|\hat{\Sigma}^{(K+1)} - \bar{\Sigma}^{(K+1)}\|_\infty \leq \delta^{(K+1),\dagger} \right] \\ &\leq 1 - 2|S_{\text{off}}| \exp \left( -\frac{n^{(K+1)}}{2} \min \left\{ \frac{(\delta^{(K+1),\dagger})^2}{64(1+4\sigma^2)^2(\gamma^{(K+1)})^2}, 1 \right\} \right) \end{aligned} \quad (63)$$

because  $S_{\text{off}}$  is symmetric.

Similar to Lemma 10, we have the following lemma for the sign-consistency of  $\hat{\Omega}^{(K+1)}$  in (6).

**Lemma 12.** For  $\xi \in (0, \delta^{(K+1),*}]$ , if

$$\|W^{(K+1)}\|_\infty \leq \xi \quad (64)$$

and

$$\frac{\omega_{\min}^{(K+1)}}{2} \geq 2\kappa_{\bar{\Gamma}^{(K+1)}} \left( \frac{8}{\alpha^{(K+1)}} + 1 \right) \xi \quad (65)$$

where  $\omega_{\min} := \min_{(i,j) \in S} |\bar{\Omega}_{ij}|$ , then the estimate  $\hat{\Omega}^{(K+1)}$  in (6) is sign-consistent.

The proof is in Section K. Similar to the proof of Theorem 2, we consider two cases of  $\omega_{\min}^{(K+1)}$ .

Case (i). If

$$\omega_{\min}^{(K+1)} \geq \frac{2\alpha^{(K+1)}}{8 + \alpha^{(K+1)}} \min \left\{ \frac{1}{3\kappa_{\bar{\Sigma}^{(K+1)}} d^{(K+1)}}, \frac{1}{3\kappa_{\bar{\Sigma}^{(K+1)}}^3 \kappa_{\bar{\Gamma}^{(K+1)}} d^{(K+1)}} \right\} \quad (66)$$

then

$$0 < \delta^{(K+1),\dagger} = \delta^{(K+1),*}$$

and

$$\frac{\omega_{\min}^{(K+1)}}{2} \geq 2\kappa_{\bar{\Gamma}^{(K+1)}} \left( \frac{8}{\alpha^{(K+1)}} + 1 \right) \delta^{(K+1),*}$$

Thus for  $\xi = \delta^{(K+1),*}$ , (65) holds. Then according to (63), with probability at least

$$1 - 2|S_{\text{off}}| \exp \left( -\frac{n^{(K+1)}}{2} \min \left\{ \frac{(\delta^{(K+1),\dagger})^2}{64(1+4\sigma^2)^2(\gamma^{(K+1)})^2}, 1 \right\} \right)$$

we have  $\|W^{(K+1)}\|_\infty \leq \delta = \delta^{(K+1),*}$  and thus by Lemma 12, we have that (6) is sign-consistent.

Case (ii). If

$$\omega_{\min}^{(K+1)} < \frac{2\alpha^{(K+1)}}{8 + \alpha^{(K+1)}} \min \left\{ \frac{1}{3\kappa_{\bar{\Sigma}^{(K+1)}} d^{(K+1)}}, \frac{1}{3\kappa_{\bar{\Sigma}^{(K+1)}}^3 \kappa_{\bar{\Gamma}^{(K+1)}} d^{(K+1)}} \right\}$$

then

$$\frac{\omega_{\min}^{(K+1)}}{2} < 2\kappa_{\bar{\Gamma}^{(K+1)}} \left( \frac{8}{\alpha^{(K+1)}} + 1 \right) \delta^{(K+1),*}$$

and

$$0 < \delta^{(K+1),\dagger} = \delta^{(K+1),\prime} \leq \delta^{(K+1),*}$$

Then

$$\frac{\omega_{\min}^{(K+1)}}{2} \geq 2\kappa_{\Gamma^{(K+1)}} \left( \frac{8}{\alpha^{(K+1)}} + 1 \right) \delta^{(K+1),\prime} \quad (67)$$

For  $\xi = \delta^{(K+1),\prime} = \delta^{(K+1),\dagger}$ , (65) holds. Now according to (63), with probability at least

$$1 - 2|S_{\text{off}}| \exp \left( -\frac{n^{(K+1)}}{2} \min \left\{ \frac{(\delta^{(K+1),\dagger})^2}{64(1+4\sigma^2)^2(\gamma^{(K+1)})^2}, 1 \right\} \right)$$

we have  $\|W^{(K+1)}\|_{\infty} \leq \delta^{(K+1),\prime} = \delta^{(K+1),\dagger}$  and thus by Lemma 12, sign-consistency is guaranteed.

In conclusion, with probability at least

$$1 - 2|S_{\text{off}}| \exp \left( -\frac{n^{(K+1)}}{2} \min \left\{ \frac{(\delta^{(K+1),\dagger})^2}{64(1+4\sigma^2)^2(\gamma^{(K+1)})^2}, 1 \right\} \right)$$

the estimator  $\hat{\Omega}^{(K+1)}$  is sign-consistent and thus  $\text{supp}(\hat{\Omega}^{(K+1)}) = \text{supp}(\bar{\Omega}^{(K+1)})$ , which completes our proof of Theorem 4.

## F. Proof of Theorem 5

For  $\forall Q \in [-1/(N \log s), 1/(N \log s)]^{N \times N}$ ,  $E^{(K+1)} \in \mathcal{E}$ , we know  $\Omega(E^{(K+1)}) = I + Q \odot \text{mat}(E^{(K+1)})$  is real and symmetric, where  $\text{mat}(\cdot) \in \{0, 1\}^{N \times N}$  is defined in the proof of Theorem 3. Thus its eigenvalues are real. By Gershgorin circle theorem (Golub & Van Loan, 2012), for any eigenvalue  $\lambda$  of  $\Omega(E^{(K+1)})$ ,  $\lambda$  lies in one of the Gershgorin circles, i.e.,  $|\lambda - \Omega(E^{(K+1)})_{jj}| \leq \sum_{l \neq j} |\Omega(E^{(K+1)})_{jl}|$  holds for some  $j$ . Since  $\text{mat}(E^{(K+1)})_{jj} = 0$  and  $|Q_{jl}| \leq 1/(N \log s)$  for  $1 \leq l \leq N$ , we have  $\Omega(E^{(K+1)})_{jj} = 1$ . Meanwhile, there are at most  $s/2$  non-zero elements in any row of  $\text{mat}(E^{(K+1)})$  because  $|E^{(K+1)}| \leq s$  and  $\text{mat}(E^{(K+1)})$  is symmetric. Thus  $\sum_{l \neq j} |\Omega(E^{(K+1)})_{jl}| \leq \frac{s}{2N \log s}$ . Then we have  $\lambda \in \left[ 1 - \frac{s}{2N \log s}, 1 + \frac{s}{2N \log s} \right]$  and  $\Omega(E^{(K+1)})$  is positive definite. Thus, we have constructed a Gaussian graphical model. Now consider  $\Omega(E^{(K+1)})^{-1}$ . Because any eigenvalue  $\mu$  of  $\Omega(E^{(K+1)})^{-1}$  is the reciprocal of an eigenvalue of  $\Omega(E^{(K+1)})$ , we have  $|\mu| \leq 1/(1 - \frac{s}{2N \log s})$ .

For any  $E^{(K+1)}, \tilde{E}^{(K+1)} \in \mathcal{E}$ , according to Theorem H.1.d. in (Marshall et al., 2010), we have

$$\lambda_1(\Omega(\tilde{E}^{(K+1)})\Omega(E^{(K+1)})^{-1}) \leq \lambda_1(\Omega(\tilde{E}^{(K+1)}))\lambda_1(\Omega(E^{(K+1)})^{-1}) \leq \frac{1 + \frac{s}{2N \log s}}{1 - \frac{s}{2N \log s}}$$

which gives us

$$\text{tr} \left( \Omega(\tilde{E}^{(K+1)})\Omega(E^{(K+1)})^{-1} \right) \leq N \lambda_1(\Omega(\tilde{E}^{(K+1)})\Omega(E^{(K+1)})^{-1}) \leq N \frac{1 + \frac{s}{2N \log s}}{1 - \frac{s}{2N \log s}} \quad (68)$$

According to the definition of  $\mathcal{E}$ , we know that  $|\mathcal{E}| = 2^{s/2}$ . Since  $E^{(K+1)}$  is uniformly distributed on  $\mathcal{E}$ , the entropy of  $E^{(K+1)}$  given  $Q$  is

$$H(E^{(K+1)}|Q) = \log |\mathcal{E}| \geq \frac{s}{2} \log 2 \quad (69)$$

Now let  $\mathbf{X} := \{X_t\}_{1 \leq t \leq n}$  be the samples from a  $N$ -dimensional multivariate Gaussian distribution with covariance  $\bar{\Sigma}$

generated according to Theorem 5. For the mutual information  $\mathbb{I}(\mathbf{X}; E^{(K+1)}|Q)$ , we have the following bound:

$$\begin{aligned}
 \mathbb{I}(\mathbf{X}; E^{(K+1)}|Q) &\leq \frac{1}{|\mathcal{E}|^2} \sum_{E^{(K+1)}} \sum_{\tilde{E}^{(K+1)}} \mathbb{KL}(P_{\mathbf{X}|E^{(K+1)},Q} \| P_{\mathbf{X}|\tilde{E}^{(K+1)},Q}) \\
 &= \frac{1}{|\mathcal{E}|^2} \sum_{E^{(K+1)}} \sum_{\tilde{E}^{(K+1)}} \sum_{t=1}^n \mathbb{KL}(P_{X_t|E^{(K+1)},Q} \| P_{X_t|\tilde{E}^{(K+1)},Q}) \\
 &= \frac{n}{|\mathcal{E}|^2} \sum_{E^{(K+1)}} \sum_{\tilde{E}^{(K+1)}} \frac{1}{2} \left[ \text{tr} \left( (I + Q \odot \text{mat}(\tilde{E}^{(K+1)}))(I + Q \odot \text{mat}(E^{(K+1)}))^{-1} \right) \right. \\
 &\quad \left. - N + \log \frac{\det(I + Q \odot \text{mat}(E^{(K+1)}))}{\det(I + Q \odot \text{mat}(\tilde{E}^{(K+1)}))} \right]
 \end{aligned} \tag{70}$$

Since the summation is taken over all  $(E^{(K+1)}, \tilde{E}^{(K+1)})$  pairs, the log term cancels with each other. For the trace term, by (68), we have

$$\text{tr} \left( (I + Q \odot \text{mat}(\tilde{E}^{(K+1)}))(I + Q \odot \text{mat}(E^{(K+1)}))^{-1} \right) \leq N \frac{1 + \frac{s}{2N \log s}}{1 - \frac{s}{2N \log s}} \tag{71}$$

for  $E^{(K+1)}, \tilde{E}^{(K+1)} \in \mathcal{E}$ . Putting (71) back to (70) gives

$$\begin{aligned}
 \mathbb{I}(\mathbf{X}; E^{(K+1)}|Q) &\leq \frac{n}{|\mathcal{E}|^2} \sum_{E^{(K+1)}} \sum_{\tilde{E}^{(K+1)}} \frac{1}{2} \left( N \frac{1 + \frac{s}{2N \log s}}{1 - \frac{s}{2N \log s}} - N \right) \\
 &= \frac{ns}{2 \log s} \frac{1}{1 - \frac{s}{2N \log s}} \\
 &\leq \frac{2ns}{\log s}
 \end{aligned} \tag{72}$$

According to our assumption that  $4 \leq s \leq N$ .

Define  $\hat{E}^{(K+1)} := \{(i, j) \in \hat{S}^{(K+1)} : i \neq j\}$ . By applying Theorem 1 in (Ghoshal & Honorio, 2017), we get

$$\begin{aligned}
 \mathbb{P}\{S^{(K+1)} \neq \hat{S}^{(K+1)}\} &\geq \mathbb{P}\{E^{(K+1)} \neq \hat{E}^{(K+1)}\} \\
 &\geq 1 - \frac{\mathbb{I}(\mathbf{X}; E^{(K+1)}|Q) + \log 2}{H(E^{(K+1)}|Q)} \\
 &\geq 1 - \frac{\frac{2ns}{\log s} + \log 2}{\log |\mathcal{E}|} \\
 &= 1 - \frac{\frac{2ns}{\log s} + \log 2}{\frac{s}{2} \log 2} \\
 &= 1 - \frac{4n}{(\log 2)(\log s)} - \frac{2}{s}
 \end{aligned}$$

where the third inequality is by (72).

## G. Proof of Lemma 8

We first prove the following lemma showing that (40) and (41) hold for deterministic covariance matrices  $\{\bar{\Sigma}^{(k)}\}_{k=1}^K$ .

**Lemma 13.** *For  $K$  deterministic matrices  $\{\bar{\Sigma}^{(k)}\}_{k=1}^K$  and  $\gamma \geq \|\bar{\Sigma}^{(k)}\|_\infty$  for  $1 \leq k \leq K$ , consider the samples  $\{X_t^{(k)}\}_{1 \leq t \leq n, 1 \leq k \leq K} \subseteq \mathbb{R}^N$  satisfying the following conditions:*

(i)  $\mathbb{E} \left[ X_t^{(k)} \right] = 0$ ,  $\text{Cov} \left( X_t^{(k)} \right) = \bar{\Sigma}^{(k)}$  for  $1 \leq t \leq n$ ,  $1 \leq k \leq K$ ;

(ii)  $\left\{ X_t^{(k)} \right\}_{1 \leq t \leq n, 1 \leq k \leq K}$  are independent;

(iii)  $\frac{X_{t,i}^{(k)}}{\sqrt{\bar{\Sigma}_{ii}^{(k)}}}$  is sub-Gaussian with parameter  $\sigma$  for  $1 \leq i \leq N$ ,  $1 \leq t \leq n$ ,  $1 \leq k \leq K$ .

Then for the empirical sample covariance matrices  $\{\hat{\Sigma}^{(k)}\}_{k=1}^K$ , (40) and (41) hold for  $1 \leq i, j \leq N$  and  $0 \leq \nu \leq 8(1 + 4\sigma^2)\gamma$ .

*Proof.* First consider the element-wise tail condition. For  $1 \leq i, j \leq N$ , we need to find an upper bound of the following probability:

$$\mathbb{P} \left[ \left| \frac{1}{nK} \sum_{k=1}^K \sum_{t=1}^n \left( X_{t,i}^{(k)} X_{t,j}^{(k)} - \bar{\Sigma}_{ij}^{(k)} \right) \right| > \nu \right] \quad (73)$$

Let  $s_i := \max_{1 \leq k \leq K} \bar{\Sigma}_{ii}^{(k)}$ ,  $s_j := \max_{1 \leq k \leq K} \bar{\Sigma}_{jj}^{(k)}$ ,  $\tilde{X}_{t,i}^{(k)} := \frac{X_{t,i}^{(k)}}{\sqrt{s_i}}$ ,  $\tilde{X}_{t,j}^{(k)} := \frac{X_{t,j}^{(k)}}{\sqrt{s_j}}$ ,  $\tilde{\rho}_{ij}^{(k)} := \frac{\bar{\Sigma}_{ij}^{(k)}}{\sqrt{s_i s_j}}$ . We have

$$(73) = \mathbb{P} \left[ 4 \left| \sum_{k,t} \left( \tilde{X}_{t,i}^{(k)} \tilde{X}_{t,j}^{(k)} - \tilde{\rho}_{ij}^{(k)} \right) \right| > \frac{4nK\nu}{\sqrt{s_i s_j}} \right]$$

Define  $U_{t,ij}^{(k)} := \tilde{X}_{t,i}^{(k)} + \tilde{X}_{t,j}^{(k)}$ ,  $V_{t,ij}^{(k)} := \tilde{X}_{t,i}^{(k)} - \tilde{X}_{t,j}^{(k)}$ . Then for any  $r \in \mathbb{R}$ ,

$$4 \sum_{k,t} \left( \tilde{X}_{t,i}^{(k)} \tilde{X}_{t,j}^{(k)} - \tilde{\rho}_{ij}^{(k)} \right) = \sum_{k,t} \left\{ \left( U_{t,ij}^{(k)} \right)^2 - 2 \left( r + \tilde{\rho}_{ij}^{(k)} \right) \right\} - \sum_{k,t} \left\{ \left( U_{t,ij}^{(k)} \right)^2 - 2 \left( r - \tilde{\rho}_{ij}^{(k)} \right) \right\} \quad (74)$$

Thus

$$(73) \leq \mathbb{P} \left[ \left| \sum_{k,t} \left\{ \left( U_{t,ij}^{(k)} \right)^2 - 2 \left( r + \tilde{\rho}_{ij}^{(k)} \right) \right\} \right| > \frac{2nK\nu}{\sqrt{s_i s_j}} \right] \\ + \mathbb{P} \left[ \left| \sum_{k,t} \left\{ \left( V_{t,ij}^{(k)} \right)^2 - 2 \left( r - \tilde{\rho}_{ij}^{(k)} \right) \right\} \right| > \frac{2nK\nu}{\sqrt{s_i s_j}} \right] \quad (75)$$

Now define

$$Z_{t,ij}^{(k)} := \left( U_{t,ij}^{(k)} \right)^2 - 2 \left( r + \tilde{\rho}_{ij}^{(k)} \right)$$

Applying the inequality  $(a+b)^m \leq 2^m(a^m + b^m)$  on  $Z_{t,ij}^{(k)}$ , we have

$$\mathbb{E} \left[ \left| Z_{t,ij}^{(k)} \right|^m \right] \leq 2^m \left\{ \mathbb{E} \left[ \left| U_{t,ij}^{(k)} \right|^{2m} \right] + \left[ 2 \left( 1 + \tilde{\rho}_{ij}^{(k)} \right) \right]^m \right\} \quad (76)$$

Let  $r_i^{(k)} := \sqrt{\frac{\bar{\Sigma}_{ii}^{(k)}}{s_i}}$ ,  $r_i^{(k)} := \sqrt{\frac{\bar{\Sigma}_{ii}^{(k)}}{s_i}}$ , then

$$\tilde{X}_{t,i}^{(k)} = \bar{X}_{t,i}^{(k)} r_i^{(k)}, \quad \tilde{X}_{t,j}^{(k)} = \bar{X}_{t,j}^{(k)} r_j^{(k)}$$

where  $\bar{X}_{t,i}^{(k)} := \frac{X_{t,i}^{(k)}}{\sqrt{\bar{\Sigma}_{ii}^{(k)}}}$ ,  $\bar{X}_{t,j}^{(k)} := \frac{X_{t,j}^{(k)}}{\sqrt{\bar{\Sigma}_{jj}^{(k)}}}$ .

Assume that  $\bar{X}_{t,i}^{(k)}$  is sub-Gaussian with parameter  $\sigma$  for  $1 \leq i \leq N$ ,  $1 \leq t \leq n$ ,  $1 \leq k \leq K$ , and then we have

$$\mathbb{E} \left[ \exp \left( \lambda \tilde{X}_{t,i}^{(k)} \right) \right] = \mathbb{E} \left[ \exp \left( \lambda \bar{X}_{t,i}^{(k)} r_i^{(k)} \right) \right] \leq \exp \left\{ \frac{\lambda^2}{2} \sigma^2 \left( r_i^{(k)} \right)^2 \right\}$$

which shows that  $\tilde{X}_{t,i}^{(k)}$  is sub-Gaussian with parameter  $\sigma r_i^{(k)}$ . Then

$$\mathbb{E} \left[ \exp \left( \lambda U_{t,ij}^{(k)} \right) \right] = \mathbb{E} \left[ \exp \left( \lambda \tilde{X}_{t,i}^{(k)} \right) \exp \left( \lambda \tilde{X}_{t,j}^{(k)} \right) \right] \\ \leq \mathbb{E} \left[ \exp \left( 2\lambda \tilde{X}_{t,i}^{(k)} \right) \right]^{\frac{1}{2}} \mathbb{E} \left[ \exp \left( 2\lambda \tilde{X}_{t,j}^{(k)} \right) \right]^{\frac{1}{2}} \\ \leq \exp \left\{ \lambda^2 \sigma^2 \left[ \left( r_i^{(k)} \right)^2 + \left( r_j^{(k)} \right)^2 \right] \right\}$$



Therefore  $U_{t,ij}^{(k)}$  is sub-Gaussian with parameter  $\sigma_{ij}^{(k)} := \sigma \sqrt{2 \left[ \left( r_i^{(k)} \right)^2 + \left( r_j^{(k)} \right)^2 \right]}$ . Similarly, we can prove that  $V_{t,ij}^{(k)}$  is sub-Gaussian with parameter  $\sigma_{ij}^{(k)}$  as well. Also note that  $\sigma_{ij}^{(k)} \leq \sigma \sqrt{2(1+1)} = 2\sigma$ .

As it is well-known (see e.g., Lemma 1.4 in (Buldygin & Kozachenko, 2000)), for a sub-Gaussian random variable  $X$  with parameter  $\sigma$ , i.e.,  $X$  that satisfies  $\mathbb{E} [e^{\lambda X}] \leq \exp \left( \frac{\lambda^2 \sigma^2}{2} \right)$ , we have:

$$\mathbb{E} [|X|^s] \leq 2 \left( \frac{s}{e} \right)^{s/2} \sigma^s \quad (77)$$

Apply this lemma on  $U_{t,ij}^{(k)}$  with  $s = 2m$ ,  $m \geq 2$  and we get

$$\mathbb{E} \left[ |U_{t,ij}^{(k)}|^{2m} \right] \leq 2 \left( \frac{2m}{e} \right)^m \left( \sigma_{ij}^{(k)} \right)^{2m}$$

According to the inequality  $m! \geq \left( \frac{m}{e} \right)^m$ , we have

$$\mathbb{E} \left[ \frac{|U_{t,ij}^{(k)}|^{2m}}{m!} \right] \leq 2^{m+1} \left( \sigma_{ij}^{(k)} \right)^2$$

Plug in (76) and we have

$$\begin{aligned} \left( \frac{\mathbb{E} \left[ |Z_{t,ij}^{(k)}|^m \right]}{m!} \right)^{\frac{1}{m}} &\leq 2^{\frac{1}{m}} \left\{ \left[ 2^{2m+1} \left( \sigma_{ij}^{(k)} \right)^{2m} \right]^{\frac{1}{m}} + \frac{4 \left( r + \tilde{\rho}_{ij}^{(k)} \right)}{\left( m! \right)^{\frac{1}{m}}} \right\} \\ &\leq 2^{\frac{1}{m}} \underbrace{\left\{ 4 \cdot 2^{\frac{1}{m}} \left( \sigma_{ij}^{(k)} \right)^2 + \frac{4 \left( r + \tilde{\rho}_{ij}^{(k)} \right)}{\left( m! \right)^{\frac{1}{m}}} \right\}}_{h(m)} \end{aligned} \quad (78)$$

Note that  $h(m)$  defined above decreases with  $m$  and  $|\tilde{\rho}_{ij}^{(k)}| \leq 1$ .

Since (74) holds for  $\forall r \in \mathbb{R}$ , we can choose  $r = \frac{\left( r_i^{(k)} \right)^2 + \left( r_j^{(k)} \right)^2}{2}$ . Then we have  $r < 1$  and

$$Z_{t,ij}^{(k)} := \left( U_{t,ij}^{(k)} \right)^2 - \left( \left( r_i^{(k)} \right)^2 + \left( r_j^{(k)} \right)^2 + 2\tilde{\rho}_{ij}^{(k)} \right)$$

Thus

$$\mathbb{E} \left[ Z_{t,ij}^{(k)} \right] = 0$$

and furthermore,

$$\begin{aligned} \sup_{m \geq 2} \left( \frac{\mathbb{E} \left[ |Z_{t,ij}^{(k)}|^m \right]}{m!} \right)^{\frac{1}{m}} &\leq h(2) \\ &= 8 \left( \sigma_{ij}^{(k)} \right)^2 + 4 \left( r + |\tilde{\rho}_{ij}^{(k)}| \right) \\ &\leq 8 \left( 1 + \left( \sigma_{ij}^{(k)} \right)^2 \right) \\ &\leq 8 \left( 1 + 4\sigma^2 \right) \end{aligned}$$

Define  $B := 8 \left( 1 + 4\sigma^2 \right)$ . If  $X$  is a random variable such that  $\mathbb{E} [X] = 0$ ,  $\left( \frac{\mathbb{E} [|X|^m]}{m!} \right)^{\frac{1}{m}} \leq B$  for  $m \geq 2$ , then

$$\mathbb{E} [e^{\lambda X}] = \mathbb{E} \left[ \sum_{k=0}^{\infty} \frac{X^k}{k!} \lambda^k \right] = 1 + \sum_{k=1}^{\infty} \lambda^k \frac{\mathbb{E} [X^k]}{k!} \leq 1 + \sum_{k=1}^{\infty} (\lambda B)^k \leq 1 + \frac{(\lambda B)^2}{1 - |\lambda| B}$$

when  $|\lambda| < \frac{1}{B}$ . Meanwhile,

$$1 + \frac{(\lambda B)^2}{1 - |\lambda|B} \leq \exp \left\{ \frac{\lambda^2 B^2}{1 - |\lambda|B} \right\} \leq \exp(2\lambda^2 B^2)$$

when  $|\lambda| \leq \frac{1}{2B}$ . Therefore for  $|\lambda| \leq \frac{1}{2B}$ ,

$$\mathbb{E}[e^{\lambda X}] \leq \exp(2\lambda^2 B^2) = \exp\left(\frac{\lambda^2 (2B)^2}{2}\right) \quad (79)$$

Then for  $X_i$ ,  $1 \leq i \leq n$  independent and satisfying  $\mathbb{E}[X_i] = 0$ ,  $\left(\frac{\mathbb{E}[|X_i|^m]}{m!}\right)^{\frac{1}{m}} \leq B$  when  $m \geq 2$ , we can claim that for  $0 \leq \epsilon \leq 2B$ ,

$$\mathbb{P}\left[\left|\sum_{i=1}^n X_i\right| > n\epsilon\right] \leq 2 \exp\left(-\frac{n\epsilon^2}{8B^2}\right) \quad (80)$$

In fact, for  $0 \leq t \leq \frac{1}{2B}$ ,

$$\begin{aligned} \mathbb{P}\left[\sum_{i=1}^n X_i > n\epsilon\right] &\leq \mathbb{P}\left[e^{t\sum_{i=1}^n X_i} \geq e^{tn\epsilon}\right] \\ &\leq e^{-tn\epsilon} \mathbb{E}\left[e^{t\sum_{i=1}^n X_i}\right] \\ &= \left(\prod_{i=1}^n \mathbb{E}\left[e^{tX_i}\right]\right) e^{-tn\epsilon} \\ &\leq \exp(2nt^2 B^2 - tn\epsilon) \end{aligned} \quad (81)$$

Thus choosing  $t = \frac{\epsilon}{4B^2} \leq \frac{1}{2B}$ , we can get

$$\mathbb{P}\left[\sum_{i=1}^n X_i > n\epsilon\right] \leq \exp\left(-\frac{n\epsilon^2}{8B^2}\right)$$

Similarly, we can also prove that

$$\mathbb{P}\left[\sum_{i=1}^n X_i < -n\epsilon\right] \leq \exp\left(-\frac{n\epsilon^2}{8B^2}\right)$$

Thus

$$\mathbb{P}\left[\left|\sum_{i=1}^n X_i\right| > n\epsilon\right] = \mathbb{P}\left[\sum_{i=1}^n X_i > n\epsilon\right] + \mathbb{P}\left[\sum_{i=1}^n X_i < -n\epsilon\right] \leq 2 \exp\left(-\frac{n\epsilon^2}{8B^2}\right)$$

Now consider  $Z_{t,ij}^{(k)}$ ,  $1 \leq t \leq n$ ,  $1 \leq k \leq K$ . These random variables are independent by our assumption and satisfy

$\mathbb{E}[Z_{t,ij}^{(k)}] = 0$ ,  $\sup_{m \geq 2} \left(\frac{\mathbb{E}[|Z_{t,ij}^{(k)}|^m]}{m!}\right)^{\frac{1}{m}} \leq 8(1 + 4\sigma^2) = B$  by our proof. Then according to (80), for  $0 \leq \frac{2\nu}{\gamma} \leq 2B$ , i.e.,  $0 \leq \nu \leq 8(1 + 4\sigma^2)\gamma$ , we have:

$$\begin{aligned} \mathbb{P}\left[\left|\sum_{k,t} Z_{t,ij}^{(k)}\right| > \frac{2nK\nu}{\gamma}\right] &\leq 2 \exp\left\{-\frac{4nK\nu^2}{8B^2\gamma^2}\right\} \\ &= 2 \exp\left\{-\frac{nK\nu^2}{128(1 + 4\sigma^2)^2\gamma^2}\right\} \end{aligned} \quad (82)$$

Since  $\gamma \geq \max_{1 \leq k \leq K} \|\bar{\Sigma}^{(k)}\|_{\infty} = \max_{1 \leq i < j \leq N} s_i \geq \sqrt{s_i s_j}$  for  $1 \leq i, j \leq N$ , we have:

$$\mathbb{P}\left[\left|\sum_{k,t} Z_{t,ij}^{(k)}\right| > \frac{2nK\nu}{\sqrt{s_i s_j}}\right] \leq \mathbb{P}\left[\left|\sum_{k,t} Z_{t,ij}^{(k)}\right| > \frac{2nK\nu}{\gamma}\right] \leq 2 \exp\left\{-\frac{nK\nu^2}{128(1 + 4\sigma^2)^2\gamma^2}\right\} \quad (83)$$

Plug in the definition of  $Z_{t,ij}^{(k)}$ , we have

$$\mathbb{P} \left[ \left| \sum_{k,t} \left\{ \left( U_{t,ij}^{(k)} \right)^2 - 2 \left( r + \tilde{\rho}_{ij}^{(k)} \right) \right\} \right| > \frac{2nK}{\sqrt{s_i s_j}} \nu \right] \leq 2 \exp \left\{ -\frac{nK\nu^2}{128(1+4\sigma^2)^2 \gamma^2} \right\} \quad (84)$$

Similarly, we can also prove that for  $0 \leq \nu \leq 8(1+4\sigma^2)\gamma$ ,

$$\mathbb{P} \left[ \left| \sum_{k,t} \left\{ \left( V_{t,ij}^{(k)} \right)^2 - 2 \left( r - \tilde{\rho}_{ij}^{(k)} \right) \right\} \right| > \frac{2nK}{\sqrt{s_i s_j}} \nu \right] \leq 2 \exp \left\{ -\frac{nK\nu^2}{128(1+4\sigma^2)^2 \gamma^2} \right\} \quad (85)$$

Thus according to (75), we have

$$\begin{aligned} (73) &\leq \mathbb{P} \left[ \left| \sum_{k,t} \left\{ \left( U_{t,ij}^{(k)} \right)^2 - 2 \left( r + \tilde{\rho}_{ij}^{(k)} \right) \right\} \right| > \frac{2nK\nu}{\sqrt{s_i s_j}} \right] \\ &\quad + \mathbb{P} \left[ \left| \sum_{k,t} \left\{ \left( V_{t,ij}^{(k)} \right)^2 - 2 \left( r - \tilde{\rho}_{ij}^{(k)} \right) \right\} \right| > \frac{2nK\nu}{\sqrt{s_i s_j}} \right] \\ &\leq 4 \exp \left\{ -\frac{nK\nu^2}{128(1+4\sigma^2)^2 \gamma^2} \right\} \end{aligned} \quad (86)$$

i.e.,

$$\begin{aligned} \mathbb{P} \left[ \left| \sum_{k=1}^K \frac{1}{K} \left( \hat{\Sigma}_{ij}^{(k)} - \bar{\Sigma}_{ij}^{(k)} \right) \right| > \nu \right] &= \mathbb{P} \left[ \left| \frac{1}{nK} \sum_{k=1}^K \sum_{t=1}^n \left( X_{t,i}^{(k)} X_{t,j}^{(k)} - \bar{\Sigma}_{ij}^{(k)} \right) \right| > \nu \right] \\ &\leq 4 \exp \left\{ -\frac{nK\nu^2}{128(1+4\sigma^2)^2 \gamma^2} \right\} \end{aligned} \quad (87)$$

for  $0 \leq \nu \leq 8(1+4\sigma^2)\gamma$ . Then consider the  $\ell_\infty$ -norm of  $\hat{\Sigma}^{(k)} - \bar{\Sigma}^{(k)}$ . Since  $\hat{\Sigma}^{(k)}, \bar{\Sigma}^{(k)}$  are all symmetric and  $N \times N$ , we have the following bound:

$$\begin{aligned} \mathbb{P} \left[ \left\| \sum_{k=1}^K \frac{1}{K} \left( \hat{\Sigma}^{(k)} - \bar{\Sigma}^{(k)} \right) \right\|_\infty > \nu \right] &\leq \frac{N(N+1)}{2} \mathbb{P} \left[ \left| \sum_{k=1}^K \frac{1}{K} \left( \hat{\Sigma}_{ij}^{(k)} - \bar{\Sigma}_{ij}^{(k)} \right) \right| > \nu \right] \\ &\leq 2N(N+1) \exp \left\{ -\frac{nK\nu^2}{128(1+4\sigma^2)^2 \gamma^2} \right\} \end{aligned} \quad (88)$$

for  $0 \leq \nu \leq 8(1+4\sigma^2)\gamma$ , which completes our proof of Lemma 13.  $\square$

Now consider the setting when  $\{\bar{\Sigma}^{(k)}\}_{k=1}^K$  are randomly generated based on Definition 3. According to Lemma 13, we have

$$\mathbb{P} \left[ \left| \sum_{k=1}^K \frac{1}{K} \left( \hat{\Sigma}_{ij}^{(k)} - \bar{\Sigma}_{ij}^{(k)} \right) \right| > \nu \mid \{\bar{\Sigma}^{(k)}\}_{k=1}^K \right] \leq \exp \left\{ -\frac{nK\nu^2}{128(1+4\sigma^2)^2 \gamma^2} \right\} \quad (89)$$

$$\mathbb{P} \left[ \left\| \sum_{k=1}^K \frac{1}{K} \left( \hat{\Sigma}^{(k)} - \bar{\Sigma}^{(k)} \right) \right\|_\infty > \nu \mid \{\bar{\Sigma}^{(k)}\}_{k=1}^K \right] \leq 2N(N+1) \exp \left\{ -\frac{nK\nu^2}{128(1+4\sigma^2)^2 \gamma^2} \right\} \quad (90)$$

for  $\hat{\Sigma}^{(k)} = \frac{1}{n} \sum_{t=1}^n X_t^{(k)} (X_t^{(k)})^\top$ ,  $1 \leq i, j \leq N$ , and  $0 \leq \nu \leq 8(1+4\sigma^2)\gamma$  with  $\gamma$  specified in (2) of the corrected condition (ii) in Definition 3.

Then by the law of total expectation (see e.g., (Weiss et al., 2005)), we have

$$\begin{aligned} \mathbb{P} \left[ \left| \sum_{k=1}^K \frac{1}{K} \left( \hat{\Sigma}_{ij}^{(k)} - \bar{\Sigma}_{ij}^{(k)} \right) \right| > \nu \right] &= \mathbb{E}_{\{\bar{\Sigma}^{(k)}\}_{k=1}^K} \left[ \mathbb{P} \left[ \left| \sum_{k=1}^K \frac{1}{K} \left( \hat{\Sigma}_{ij}^{(k)} - \bar{\Sigma}_{ij}^{(k)} \right) \right| > \nu \mid \{\bar{\Sigma}^{(k)}\}_{k=1}^K \right] \right] \\ &\leq \mathbb{E}_{\{\bar{\Sigma}^{(k)}\}_{k=1}^K} \left[ \exp \left\{ -\frac{nK\nu^2}{128(1+4\sigma^2)^2\gamma^2} \right\} \right] \\ &= \exp \left\{ -\frac{nK\nu^2}{128(1+4\sigma^2)^2\gamma^2} \right\} \end{aligned}$$

Therefore,

$$\begin{aligned} \mathbb{P} \left[ \left\| \sum_{k=1}^K \frac{1}{K} \left( \hat{\Sigma}^{(k)} - \bar{\Sigma}^{(k)} \right) \right\|_{\infty} > \nu \right] &= \mathbb{E}_{\{\bar{\Sigma}^{(k)}\}_{k=1}^K} \left[ \mathbb{P} \left[ \left\| \sum_{k=1}^K \frac{1}{K} \left( \hat{\Sigma}^{(k)} - \bar{\Sigma}^{(k)} \right) \right\|_{\infty} > \nu \mid \{\bar{\Sigma}^{(k)}\}_{k=1}^K \right] \right] \\ &\leq \mathbb{E}_{\{\bar{\Sigma}^{(k)}\}_{k=1}^K} \left[ 2N(N+1) \exp \left\{ -\frac{nK\nu^2}{128(1+4\sigma^2)^2\gamma^2} \right\} \right] \\ &= 2N(N+1) \exp \left\{ -\frac{nK\nu^2}{128(1+4\sigma^2)^2\gamma^2} \right\} \end{aligned}$$

which completes the proof of Lemma 8. Also notice that the proof above does not rely on any assumption on the distribution of  $\{\bar{\Sigma}^{(k)}\}_{k=1}^K$ . Thus, (40) and (41) hold as long as condition (iii), (iv) and (v) in Definition 3 are satisfied.

## H. Proof of Lemma 9

By definition,  $H$  is a function that maps  $K$  matrices to a symmetric matrix of dimension  $N$ , since  $\bar{\Omega}^{(k)} = \bar{\Omega} + \Delta^{(k)} \succ 0$  with probability 1 according to condition (ii) in Definition 3. For  $\forall k \in \{1, \dots, K\}$ , let  $\{\Delta^{(1)}, \dots, \Delta^{(k)}, \dots, \Delta^{(K)}, \Delta'^{(k)}\}$  be an i.i.d. family of random matrices following distribution  $P$  in Definition 3. Consider  $H_1^{(k)} = H(\Delta^{(1)}, \dots, \Delta^{(k)}, \dots, \Delta^{(K)})$  and  $H_2^{(k)} = H(\Delta^{(1)}, \dots, \Delta'^{(k)}, \dots, \Delta^{(K)})$ . We have

$$\begin{aligned} \left\| H_1^{(k)} - H_2^{(k)} \right\|_2 &= \left\| \frac{1}{K} (\bar{\Omega} + \Delta'^{(k)})^{-1} - (\bar{\Omega} + \Delta^{(k)})^{-1} \right\|_2 \\ &= \frac{1}{K} \left\| (\bar{\Omega} + \Delta'^{(k)})^{-1} - \bar{\Omega}^{-1} + \bar{\Omega}^{-1} - (\bar{\Omega} + \Delta^{(k)})^{-1} \right\|_2 \\ &\leq \frac{1}{K} \left\| (\bar{\Omega} + \Delta'^{(k)})^{-1} - \bar{\Omega}^{-1} \right\|_2 + \frac{1}{K} \left\| (\bar{\Omega} + \Delta^{(k)})^{-1} - \bar{\Omega}^{-1} \right\|_2 \end{aligned} \quad (91)$$

Since  $\mathbb{P}_{\Delta \sim P} [\left\| \Delta \right\|_2 \leq c_{\max} \leq \frac{\lambda_{\min}}{2}] = 1$  with  $\lambda_{\min} = \lambda_{\min}(\bar{\Omega})$  by (2) and since  $\bar{\Omega} \succ 0$ , we have

$$\left\| (\bar{\Omega} + \Delta^{(k)})^{-1} - \bar{\Omega}^{-1} \right\|_2 \leq \frac{c_{\max}}{\lambda_{\min}(\lambda_{\min} - c_{\max})} \leq \frac{2c_{\max}}{\lambda_{\min}^2}$$

and

$$\left\| (\bar{\Omega} + \Delta'^{(k)})^{-1} - \bar{\Omega}^{-1} \right\|_2 \leq \frac{c_{\max}}{\lambda_{\min}(\lambda_{\min} - c_{\max})} \leq \frac{2c_{\max}}{\lambda_{\min}^2}$$

according to Equation (7.2) in (El Ghaoui, 2002). Plug the above inequalities in (91) and we can get

$$\left\| H_1^{(k)} - H_2^{(k)} \right\|_2 \leq \frac{1}{K} \left\| (\bar{\Omega} + \Delta'^{(k)})^{-1} - \bar{\Omega}^{-1} \right\|_2 + \frac{1}{K} \left\| (\bar{\Omega} + \Delta^{(k)})^{-1} - \bar{\Omega}^{-1} \right\|_2 \leq \frac{4c_{\max}}{K\lambda_{\min}^2} \quad (92)$$

For  $k = 1, \dots, K$ , define  $A_k = \frac{4c_{\max}}{K\lambda_{\min}^2} I_N$  with  $I_N \in \mathbb{R}^{N \times N}$  being an identity matrix. Then by (92), we have

$$(H_1^{(k)} - H_2^{(k)})^2 \preceq A_k^2$$

where  $X \preceq Y \iff Y - X \succeq 0$ .

Define  $\sigma_\Delta^2 := \left\| \sum_{k=1}^K A_k^2 \right\|_2 = \sum_{k=1}^K \left( \frac{4c_{\max}}{K\lambda_{\min}^2} \right)^2 = \frac{16c_{\max}^2}{K\lambda_{\min}^4}$ . Then according to Corollary 7.5 in (Tropp, 2011), we have

$$\mathbb{P}[\lambda_{\max}(H - \mathbb{E}[H]) > t] \leq N \exp \left\{ -\frac{t^2}{8\sigma_\Delta^2} \right\} \leq N \exp \left\{ -\frac{\lambda_{\min}^4 K t^2}{128c_{\max}^2} \right\} \quad (93)$$

Consider  $-H(\Delta^{(1)}, \dots, \Delta^{(K)})$ . We have

$$((-H_1^{(k)}) - (-H_2^{(k)}))^2 \preceq A_k^2$$

The conditions of Corollary 7.5 in (Tropp, 2011) are also satisfied. Thus, we have

$$\mathbb{P}[-\lambda_{\min}(H - \mathbb{E}[H]) > t] = \mathbb{P}[\lambda_{\max}((-H) - (-\mathbb{E}[H])) > t] \leq N \exp \left\{ -\frac{t^2}{8\sigma_\Delta^2} \right\} \leq N \exp \left\{ -\frac{\lambda_{\min}^4 K t^2}{128c_{\max}^2} \right\} \quad (94)$$

By (93) and (94), we have

$$\begin{aligned} \mathbb{P}[\|H - \mathbb{E}[H]\|_2 > t] &= \mathbb{P}[\lambda_{\max}(H - \mathbb{E}[H]) > t, -\lambda_{\min}(H - \mathbb{E}[H]) > t] \\ &\leq \mathbb{P}[\lambda_{\max}(H - \mathbb{E}[H]) > t] + \mathbb{P}[-\lambda_{\min}(H - \mathbb{E}[H]) > t] \\ &\leq 2N \exp \left\{ -\frac{\lambda_{\min}^4 K t^2}{128c_{\max}^2} \right\} \end{aligned} \quad (95)$$

which gives us (43).

## I. Proof of Lemma 10

For  $\xi \in (0, \delta^*]$ , we have proved that if  $\left\| \sum_{k=1}^K \frac{T^{(k)}}{T} W^{(k)} \right\|_\infty \leq \xi$  then  $\|\Delta\|_\infty \leq 2\kappa_\Gamma \left( \frac{8}{\alpha} + 1 \right) \xi$ ,  $\tilde{\Omega} = \hat{\Omega}$  and  $\text{supp}(\hat{\Omega}) \subseteq \text{supp}(\tilde{\Omega})$ .

Therefore if we further assume that

$$\frac{\omega_{\min}}{2} \geq 2\kappa_\Gamma \left( \frac{8}{\alpha} + 1 \right) \xi$$

we will have

$$\frac{\omega_{\min}}{2} \geq \|\Delta\|_\infty = \|\hat{\Omega} - \bar{\Omega}\|_\infty$$

Then for any  $(i, j) \in S^c = [\text{supp}(\bar{\Omega})]^c$ ,  $\bar{\Omega}_{ij} = 0$ , we have  $[\text{supp}(\bar{\Omega})]^c \subseteq [\text{supp}(\hat{\Omega})]^c$  and thus  $(i, j) \in [\text{supp}(\hat{\Omega})]^c$ ,  $\hat{\Omega}_{ij} = 0 = \bar{\Omega}_{ij}$

For any  $(i, j) \in S = \text{supp}(\bar{\Omega})$ , we have

$$\begin{aligned} |\hat{\Omega}_{ij} - \bar{\Omega}_{ij}| &\leq \|\hat{\Omega} - \bar{\Omega}\|_\infty \leq \frac{\omega_{\min}}{2} = \frac{1}{2} \min_{1 \leq k, l \leq N} \bar{\Omega}_{kl} \leq \frac{1}{2} |\bar{\Omega}_{ij}| \\ \Rightarrow -\frac{1}{2} |\bar{\Omega}_{ij}| &\leq \hat{\Omega}_{ij} - \bar{\Omega}_{ij} \leq \frac{1}{2} |\bar{\Omega}_{ij}| \end{aligned}$$

If  $\bar{\Omega}_{ij} > 0$ , then

$$\begin{aligned} -\frac{1}{2} \bar{\Omega}_{ij} &\leq \hat{\Omega}_{ij} - \bar{\Omega}_{ij} \\ \hat{\Omega}_{ij} &\geq \frac{1}{2} \bar{\Omega}_{ij} > 0 \end{aligned}$$

If  $\bar{\Omega}_{ij} < 0$ , then

$$\begin{aligned} \hat{\Omega}_{ij} - \bar{\Omega}_{ij} &\leq -\frac{1}{2} \bar{\Omega}_{ij} \\ \hat{\Omega}_{ij} &\leq \frac{1}{2} \bar{\Omega}_{ij} < 0 \end{aligned}$$

In conclusion,  $\text{sign}(\hat{\Omega}_{ij}) = \text{sign}(\bar{\Omega}_{ij})$  for  $\forall i, j \in \{1, 2, \dots, N\}$ . The estimate  $\hat{\Omega}$  in (5) is sign-consistent.

## J. Proof of Lemma 11

Plug  $\mu = \bar{\Sigma}^{(K+1), S^c} = (\bar{\Sigma}_{S^e}^{(K+1)}, 0)$  and  $\nu = \text{diag}(\bar{\Sigma}^{(K+1)} - \hat{\Sigma}^{(K+1)})$  in (61). We have the following optimization problem

$$\hat{\Omega}^{(K+1)} = \arg \min_{\Omega \in \mathcal{S}_{++}^N} \ell^{(K+1)}(\Omega) + \lambda \|\Omega\|_1 + \langle \bar{\Sigma}^{(K+1), S^c}, \Omega \rangle + \langle \text{diag}(\bar{\Sigma}^{K+1} - \hat{\Sigma}^{K+1}), \text{diag}(\Omega - \hat{\Omega}) \rangle$$

Now we can prove with the five steps in the primal-dual witness approach.

### J.1. Step 1

For  $(\Omega_{S^{(K+1)}}, 0) \in \mathcal{S}_{++}^N$ , we need to verify  $[\nabla^2 \ell^{(K+1)}(\Omega)]_{S^{(K+1)} S^{(K+1)}} \succ 0$ . In fact,

$$\nabla \ell^{(K+1)}(\Omega) = \hat{\Sigma}^{(K+1), S} - \Omega^{-1} \quad (96)$$

$$\nabla^2 \ell^{(K+1)}(\Omega) = \Gamma(\Omega) = \Omega^{-1} \otimes \Omega^{-1} \quad (97)$$

For  $(\Omega_{S^{(K+1)}}, 0) \in \mathcal{S}_{++}^N$ , we have  $\Gamma((\Omega_{S^{(K+1)}}, 0)) \succ 0$ ,  $\nabla^2 \ell^{(K+1)}(\Omega) \succ 0$ . Thus following the same steps in section B.2, we can prove  $[\nabla^2 \ell^{(K+1)}(\Omega)]_{S^{(K+1)} S^{(K+1)}} \succ 0$ .

### J.2. Step 2

Construct the primal variable  $\tilde{\Omega}$  by making  $\tilde{\Omega}_{[S^{(K+1)}]^c} = 0$  and solving the restricted problem:

$$\begin{aligned} \tilde{\Omega}_{S^{(K+1)}} = \arg \min_{(\Omega_{S^{(K+1)}}, 0) \in \mathcal{S}_{++}^N} & \ell^{(K+1)}((\Omega_{S^{(K+1)}}, 0)) + \lambda \|\Omega_{S^{(K+1)}}\|_1 \\ & + \langle \bar{\Sigma}^{(K+1), S^c}, (\Omega_{S^{(K+1)}}, 0) \rangle + \langle \text{diag}(\bar{\Sigma}^{K+1} - \hat{\Sigma}^{K+1}), \text{diag}((\Omega_{S^{(K+1)}}, 0) - \hat{\Omega}) \rangle \end{aligned} \quad (98)$$

### J.3. Step 3

Choose the dual variable  $\tilde{Z}$  in order to fulfill the complementary slackness condition of (61):

$$\begin{cases} \tilde{Z}_{ij} = 1, & \text{if } \tilde{\Omega}_{ij} > 0 \\ \tilde{Z}_{ij} = -1, & \text{if } \tilde{\Omega}_{ij} < 0 \\ \tilde{Z}_{ij} \in [-1, 1], & \text{if } \tilde{\Omega}_{ij} = 0 \end{cases} \quad (99)$$

Therefore we have

$$\|\tilde{Z}\|_\infty \leq 1 \quad (100)$$

### J.4. Step 4

$\tilde{Z}$  is the subgradient of  $\|\tilde{\Omega}\|_1$ . Solve for the dual variable  $\tilde{Z}_{[S^{(K+1)}]^c}$  in order that  $(\tilde{\Omega}, \tilde{Z})$  fulfills the stationarity condition of (61):

$$\left[ \nabla \ell^{(K+1)} \left( \left( \tilde{\Omega}_{S^{(K+1)}}, 0 \right) \right) \right]_{S^{(K+1)}} + \lambda \tilde{Z}_{S^{(K+1)}} + I_N \text{diag}(\bar{\Sigma}^{(K+1)} - \hat{\Sigma}^{(K+1)}) = 0 \quad (101)$$

$$\left[ \nabla \ell^{(K+1)} \left( \left( \tilde{\Omega}_{S^{(K+1)}}, 0 \right) \right) \right]_{[S^{(K+1)}]^c} + \lambda \tilde{Z}_{[S^{(K+1)}]^c} + \bar{\Sigma}_{[S^{(K+1)}]^c}^{(K+1), S^c} = 0 \quad (102)$$

where  $I_N \in \mathbb{R}^{N \times N}$  is an identity matrix.

### J.5. Step 5

Now we need to verify that the dual variable solved by Step 4 satisfied the strict dual feasibility condition:

$$\|\tilde{Z}_{[S^{(K+1)}]^c}\|_\infty < 1 \quad (103)$$

If we can show the strict dual feasibility condition holds, we can claim that the solution in (98) is equal to the solution in (6), i.e.,  $\tilde{\Omega} = \hat{\Omega}^{(K+1)}$ . Thus we will have

$$\text{supp} \left( \hat{\Omega}^{(K+1)} \right) = \text{supp} \left( \tilde{\Omega} \right) \subseteq S^{(K+1)} = \text{supp} \left( \bar{\Omega}^{(K+1)} \right)$$

### J.6. Proof of the Strict Dual Feasibility Condition

Plug (96) in the stationarity condition of (6), we have

$$\hat{\Sigma}^{(K+1),S} - \tilde{\Omega}^{-1} + \lambda \tilde{Z} + \bar{\Sigma}^{(K+1),S^c} + I_N \text{diag}(\bar{\Sigma}^{K+1} - \hat{\Sigma}^{K+1}) = 0 \quad (104)$$

Define  $\Psi := \tilde{\Omega} - \bar{\Omega}^{(K+1)}$ ,  $R(\Psi) := \tilde{\Omega}^{-1} - \bar{\Sigma}^{(K+1)} + \bar{\Sigma}^{(K+1)}\Psi\bar{\Sigma}^{(K+1)}$ . Notice that  $W^{(K+1)} = \bar{\Sigma}^{(K+1),S_{\text{off}}} - \hat{\Sigma}^{(K+1),S_{\text{off}}}$ . Then we can rewrite (104) as

$$\begin{aligned} 0 &= \hat{\Sigma}^{(K+1),S} - \tilde{\Omega}^{-1} + \lambda \tilde{Z} + \bar{\Sigma}^{(K+1),S^c} + I_N \text{diag}(\bar{\Sigma}^{K+1} - \hat{\Sigma}^{K+1}) \\ &= \hat{\Sigma}^{(K+1),S} - (\tilde{\Omega} - \bar{\Sigma}^{(K+1)} + \bar{\Sigma}^{(K+1)}\Psi\bar{\Sigma}^{(K+1)}) - \bar{\Sigma}^{(K+1)} + \bar{\Sigma}^{(K+1)}\Psi\bar{\Sigma}^{(K+1)} + \bar{\Sigma}^{(K+1),S^c} \\ &\quad + I_N \text{diag}(\bar{\Sigma}^{K+1} - \hat{\Sigma}^{K+1}) + \lambda \tilde{Z} \\ &= \hat{\Sigma}^{(K+1),S_{\text{off}}} + I_N \text{diag}(\hat{\Sigma}^{(K+1)}) - R(\Psi) - \bar{\Sigma}^{(K+1),S} + I_N \text{diag}(\bar{\Sigma}^{K+1} - \hat{\Sigma}^{K+1}) + \lambda \tilde{Z} \\ &= \hat{\Sigma}^{(K+1),S_{\text{off}}} - \bar{\Sigma}^{(K+1),S_{\text{off}}} + \bar{\Sigma}^{(K+1)}\Psi\bar{\Sigma}^{(K+1)} - R(\Psi) + \lambda \tilde{Z} \\ &= W^{(K+1)} + \bar{\Sigma}^{(K+1)}\Psi\bar{\Sigma}^{(K+1)} - R(\Psi) + \lambda \tilde{Z} \end{aligned} \quad (105)$$

Now apply Lemma 7 with  $K = 1$  and we can get Lemma 11.

### K. Proof of Lemma 12

For  $\xi \in (0, \delta^{(K+1),*}]$ , in Lemma 11, we have proved that if  $\|W^{(K+1)}\|_\infty \leq \xi$  then  $\|\hat{\Omega}^{(K+1)} - \bar{\Omega}^{(K+1)}\|_\infty \leq 2\kappa_{\bar{\Gamma}^{(K+1)}} \left(\frac{8}{\alpha^{(K+1)}} + 1\right) \xi$  and  $\text{supp}(\hat{\Omega}^{(K+1)}) \subseteq \text{supp}(\bar{\Omega}^{(K+1)})$ .

Therefore if we further assume that

$$\frac{\omega_{\min}^{(K+1)}}{2} \geq 2\kappa_{\bar{\Gamma}^{(K+1)}} \left(\frac{8}{\alpha^{(K+1)}} + 1\right) \xi$$

we will have

$$\frac{\omega_{\min}^{(K+1)}}{2} \geq \|\hat{\Omega}^{(K+1)} - \bar{\Omega}^{(K+1)}\|_\infty$$

Then for any  $(i, j) \in [S^{(K+1)}]^c = [\text{supp}(\bar{\Omega}^{(K+1)})]^c$ ,  $\bar{\Omega}_{ij}^{(K+1)} = 0$ , we have  $[\text{supp}(\bar{\Omega}^{(K+1)})]^c \subseteq [\text{supp}(\hat{\Omega}^{(K+1)})]^c$  and thus  $(i, j) \in [\text{supp}(\hat{\Omega}^{(K+1)})]^c$ ,  $\hat{\Omega}_{ij}^{(K+1)} = 0 = \bar{\Omega}_{ij}^{(K+1)}$

For any  $(i, j) \in S^{(K+1)} = \text{supp}(\bar{\Omega}^{(K+1)})$ , we have

$$\begin{aligned} |\hat{\Omega}_{ij}^{(K+1)} - \bar{\Omega}_{ij}^{(K+1)}| &\leq \|\hat{\Omega}^{(K+1)} - \bar{\Omega}^{(K+1)}\|_\infty \leq \frac{\omega_{\min}^{(K+1)}}{2} = \frac{1}{2} \min_{1 \leq k, l \leq N} \bar{\Omega}_{kl}^{(K+1)} \leq \frac{1}{2} |\bar{\Omega}_{ij}^{(K+1)}| \\ &\Rightarrow -\frac{1}{2} |\bar{\Omega}_{ij}^{(K+1)}| \leq \hat{\Omega}_{ij}^{(K+1)} - \bar{\Omega}_{ij}^{(K+1)} \leq \frac{1}{2} |\bar{\Omega}_{ij}^{(K+1)}| \end{aligned}$$

If  $\bar{\Omega}_{ij}^{(K+1)} > 0$ , then

$$\begin{aligned} -\frac{1}{2} \bar{\Omega}_{ij}^{(K+1)} &\leq \hat{\Omega}_{ij}^{(K+1)} - \bar{\Omega}_{ij}^{(K+1)} \\ \hat{\Omega}_{ij}^{(K+1)} &\geq \frac{1}{2} \bar{\Omega}_{ij}^{(K+1)} > 0 \end{aligned}$$

If  $\bar{\Omega}_{ij}^{(K+1)} < 0$ , then

$$\begin{aligned} \hat{\Omega}_{ij}^{(K+1)} - \bar{\Omega}_{ij}^{(K+1)} &\leq -\frac{1}{2} \bar{\Omega}_{ij}^{(K+1)} \\ \hat{\Omega}_{ij}^{(K+1)} &\leq \frac{1}{2} \bar{\Omega}_{ij}^{(K+1)} < 0 \end{aligned}$$

In conclusion,  $\text{sign}(\hat{\Omega}_{ij}^{(K+1)}) = \text{sign}(\bar{\Omega}_{ij}^{(K+1)})$  for  $\forall i, j \in \{1, 2, \dots, N\}$ . The estimate  $\hat{\Omega}^{(K+1)}$  in (6) is sign-consistent.
